1 Ash1 and Tup1 Dependent Repression of the *Saccharomyces cerevisiae* HO promoter  
2 Requires Activator-Dependent Nucleosome Eviction

3

4

5 Emily J. Parnell<sup>1</sup>, Timothy J. Parnell<sup>2</sup>, Chao Yan<sup>3,4,5</sup>, Lu Bai<sup>3,4,5</sup>, David J. Stillman<sup>1\*</sup>

6

7 <sup>1</sup> Department of Pathology, University of Utah Health Sciences Center, Salt Lake City,  
8 Utah 84112, USA

9 <sup>2</sup> Bioinformatics Shared Resource, Huntsman Cancer Institute, University of Utah, Salt  
10 Lake City, Utah 84112, USA

11 <sup>3</sup> Center for Eukaryotic Gene Regulation, The Pennsylvania State University, University  
12 Park, Pennsylvania 16802, USA

13 <sup>4</sup> Department of Biochemistry and Molecular Biology, The Pennsylvania State  
14 University, University Park, Pennsylvania 16802, USA

15 <sup>5</sup> Department of Physics, The Pennsylvania State University, University Park,  
16 Pennsylvania 16802, USA

17

18 Current Address for Chao Yan: New York Genome Center 101 Avenue of the Americas  
19 New York, NY 10013

20

21 \* Corresponding Author

22 E-mail: [\\*david.stillman@path.utah.edu](mailto:*david.stillman@path.utah.edu)

23

24 ABSTRACT

25           Transcriptional regulation of the *Saccharomyces cerevisiae* *HO* gene is highly  
26 complex, requiring a balance of multiple activating and repressing factors to ensure that  
27 only a few transcripts are produced in mother cells within a narrow window of the cell  
28 cycle. Here, we show that the Ash1 repressor associates with two DNA sequences that  
29 are usually concealed within nucleosomes in the *HO* promoter and recruits the Tup1  
30 corepressor and the Rpd3 histone deacetylase, both of which are required for full  
31 repression in daughters. Genome-wide ChIP identified greater than 200 additional sites  
32 of co-localization of these factors, primarily within large, intergenic regions from which  
33 they could regulate adjacent genes. Most Ash1 binding sites are in nucleosome  
34 depleted regions (NDRs), while a small number overlap nucleosomes, similar to *HO*.  
35 We demonstrate that Ash1 binding to the *HO* promoter does not occur in the absence of  
36 the Swi5 transcription factor, which recruits coactivators that evict nucleosomes,  
37 including the nucleosomes obscuring the Ash1 binding sites. In the absence of Swi5,  
38 artificial nucleosome depletion allowed Ash1 to bind, demonstrating that nucleosomes  
39 are inhibitory to Ash1 binding. The location of binding sites within nucleosomes may  
40 therefore be a mechanism for limiting repressive activity to periods of nucleosome  
41 eviction that are otherwise associated with activation of the promoter. Our results  
42 illustrate that activation and repression can be intricately connected, and events set in  
43 motion by an activator may also ensure the appropriate level of repression and reset the  
44 promoter for the next activation cycle.

45

46 INTRODUCTION

47           Chromatin is generally repressive to transcription, limiting access of regulatory  
48 factors and RNA polymerase to the DNA [1]. However, nucleosomes are dynamic  
49 structures that can be moved, loosened or evicted under certain conditions, allowing  
50 regulatory proteins to associate with their binding sites. Alteration of nucleosomes is

51 accomplished by remodeling complexes that use the energy of ATP hydrolysis to slide  
52 or evict nucleosomes and by histone-modifying factors that change the state of histones  
53 and their interaction with DNA [2, 3]. This ability to dynamically modify nucleosomes  
54 allows transcription to be a regulated process, in which factor binding sites are  
55 concealed by nucleosomes until an appropriate stimulus leads to their movement or  
56 eviction. The access of transcription factors to promoter sites is thus dictated in part by  
57 chromatin state, and is an important aspect of gene regulation.

58         The *Saccharomyces cerevisiae HO* gene is an important model for examining the  
59 interplay between transcription factors and chromatin. The *HO* promoter is highly  
60 regulated, with a complexity more similar to higher eukaryotic promoters than typical  
61 yeast promoters, but with an ease of genetic manipulation [4]. Nucleosome positions  
62 across the *HO* promoter are well-defined [5, 6]. The process of *HO* activation involves  
63 progressive waves of nucleosome eviction across the promoter during the cell cycle,  
64 ultimately reaching the transcription start site and allowing for association of RNA  
65 polymerase [7, 8]. Nucleosomes are then quickly redeposited to restrict *HO* expression  
66 to a narrow window within G1 of the cell cycle, with only a few transcripts produced per  
67 cell [7, 9, 10].

68         Expression of *HO* is also regulated to ensure the gene product is present in only  
69 one of two cells from each mitotic division. Yeast cells divide asymmetrically, giving rise  
70 to a large mother cell and a smaller daughter cell. The *HO* gene is expressed only in  
71 haploid mother cells and encodes a site-specific endonuclease that initiates mating type  
72 interconversion by cleaving the *MAT* locus [9, 11, 12]. The ability of the mother, but not  
73 the daughter, to alter its mating type allows mother and daughter cells to subsequently  
74 mate, forming a diploid to enhance survival.

75         The *HO* promoter is unusually long for a yeast promoter, with known transcription  
76 factor binding sites extending to nearly 2 kb upstream of the transcription start site [13-  
77 15] and the next upstream gene at -3000 bp. In addition, a long ncRNA that initiates at -

78 2700 affects *HO* promoter memory under specific conditions [16]. Upstream Regulatory  
79 Sequences URS1 (-1900 to -1200) and URS2 (-900 to -200) contain binding sites for  
80 activating transcription factors [14, 17, 18]. Promoter activation proceeds as an ordered  
81 recruitment of factors, initiated by entry of the Swi5 pioneer transcription factor into the  
82 nucleus during anaphase [7, 19-21]. Swi5 associates with two nucleosome-depleted  
83 regions (NDRs) in URS1 at -1800 and -1300 and recruits three coactivator complexes:  
84 the SWI/SNF chromatin remodeler, the SAGA complex with the Gcn5 histone  
85 acetyltransferase, and Mediator [13-15, 22-25]. The coactivators are interdependent  
86 upon one another for their association with the *HO* promoter and are responsible for  
87 chromatin changes that promote expression, most notably the removal of nucleosomes  
88 that initiates within URS1 and then spreads to URS2 [7, 26]. Sites for the SCB binding  
89 factor (SBF) within URS2 are occluded by nucleosomes for most of the cell cycle, but  
90 become exposed as nucleosome eviction spreads toward the transcription start site [7,  
91 8]. SBF recruits the coactivator complexes to URS2, allowing further propagation of  
92 nucleosome eviction to the TATA box and subsequent association of RNA polymerase  
93 and initiation of transcription [7].

94 Many repressors and corepressors are also required for maintaining the  
95 appropriate level of *HO* expression. The activities of these proteins antagonize those of  
96 the coactivators, providing a balance that ensures the precise timing and level of *HO*  
97 promoter activity [27]. Genetic screens have identified subunits of two histone  
98 deacetylase complexes, Rpd3 and Hda1, as negative regulators of *HO* expression [27-  
99 31]. These complexes act in opposition to the histone acetyltransferase activity of Gcn5,  
100 making the nucleosomes more repressive to transcription. At least two DNA-binding  
101 proteins recruit the Rpd3 complex to the *HO* promoter. The first, Ash1, is a GATA-family  
102 zinc finger protein that accumulates predominantly in daughter cells and is the critical  
103 determinant of mother-specific *HO* expression [32-34]. A definitive binding site(s) for  
104 Ash1 has not been identified, but it has been suggested to bind to YTGAT motifs

105 throughout the *HO* promoter [34]. The second protein, Ume6, was originally identified as  
106 a meiotic regulator, and represses transcription of many genes [35]. It binds to a single  
107 site within the *HO* promoter in a nucleosomal linker between URS1 and URS2 [27].

108 Other negative regulators identified in genetic screens for inappropriate  
109 transcriptional activation [27] may antagonize the SWI/SNF complex at the *HO*  
110 promoter. The Isw2 ATP-dependent chromatin remodeler promotes the movement of  
111 nucleosomes into NDRs and could play a role in opposing the nucleosomal eviction  
112 caused by SWI/SNF [36]. Ume6 is known to recruit both Rpd3 and Isw2 to promoters  
113 and could be doing so at *HO* [37, 38]. The Tup1 corepressor protein was also identified  
114 as a negative regulator of *HO* expression activation [27]. Tup1, usually found in complex  
115 with Cyc8 in a 4:1 ratio, is recruited to many promoters in yeast by a variety of  
116 sequence-specific DNA-binding proteins, and has been suggested to reduce expression  
117 by masking the activation domain of its recruiting protein, inhibiting its interaction with  
118 SWI/SNF [39-42]. Tup1 also has genetic and biochemical interactions with the Rpd3  
119 and Hda1 histone deacetylase complexes, providing another possible mechanism for it  
120 to balance the action of coactivators at the *HO* promoter [43-47]. The manner in which  
121 Tup1 is brought to the *HO* promoter is not clear, as there are no known sites for Tup1  
122 recruiters.

123 In this report, we expand upon our knowledge of the Ash1 and Tup1 negative  
124 regulators and their relationship to chromatin, both at the *HO* promoter and genome-  
125 wide. We demonstrate that Tup1 is recruited to the *HO* promoter via the Ash1 DNA-  
126 binding protein. Ash1 is thus responsible for bringing both Tup1 and Rpd3 to the *HO*  
127 promoter, and recruitment of Tup1 is independent of the Rpd3 complex. ChIP  
128 experiments showed nearly identical binding profiles for Ash1 and Tup1 across the *HO*  
129 promoter, and nucleosomes conceal their sites of association for most of the cell cycle.  
130 We used ChIP-Seq to identify other Ash1, Tup1 and Rpd3 sites throughout the *S.*  
131 *cerevisiae* genome to determine whether Ash1 has similar properties within other

132 promoters. We found the vast majority of Ash1 sites display colocalization with both  
133 Tup1 and Rpd3. Sites of 3-way overlap are mostly within NDRs in intergenic segments  
134 of the genome. Ash1/Tup1 association with nucleosomal *HO* promoter DNA is therefore  
135 a notable exception, suggesting that chromatin changes at *HO* may be necessary for  
136 association of not only the SBF activating factor but also the Ash1/Tup1 repressing  
137 factors. We demonstrate that Ash1 and Tup1 bind to the *HO* promoter only after the  
138 Swi5 activator binds and initiates nucleosome eviction. Artificially decreasing  
139 nucleosome occupancy at *HO* allowed Ash1 binding in the absence of the activator,  
140 suggesting that the presence of nucleosomes impedes association of Ash1/Tup1 until  
141 the *HO* promoter activation cascade has begun.

142

## 143 RESULTS

### 144 **Tup1 association with the *HO* promoter requires the presence of Ash1**

145 In a previous study, we performed a genetic screen to identify negative  
146 regulators of the *HO* promoter [27]. One of the mutants isolated in the screen was a  
147 hypomorphic allele of *TUP1*, *tup1(H575Y)*, suggesting that Tup1 may play a role in  
148 repressing *HO* transcription. To determine whether Tup1 associates with the *HO*  
149 promoter, we tagged endogenous Tup1 with a V5 epitope and performed ChIP analysis  
150 in asynchronous cells. Tup1-V5 bound to the *HO* promoter with a predominant peak  
151 centered at approximately -1200 relative to the *HO* ATG (Fig 1A, blue; “Downstream  
152 Site”). Substantial binding also extended upstream to approximately -2100 (Fig 1A;  
153 “Upstream Site”), suggesting there may be at least two sites of association. Tup1 is  
154 recruited to yeast promoters by a variety of DNA-binding transcription factors [39, 40].  
155 We therefore sought to determine which protein is responsible for Tup1 association with  
156 the *HO* promoter. Our prior studies on the Ash1 repressor had shown that Ash1 has a  
157 binding profile at *HO* similar to that of Tup1 (Fig 1A, red), suggesting the possibility that  
158 Ash1 could be responsible for Tup1 recruitment to *HO*.

159 ChIP analysis of Tup1 binding in wild type and in an *ash1* mutant confirmed our  
160 hypothesis that Ash1 is necessary for most of the Tup1 localization to the *HO* promoter.  
161 Binding was substantially reduced, though not completely eliminated, in the *ash1*  
162 mutant, both at the main peak (Downstream Site; Fig 1B) and further upstream  
163 (Upstream Site). The presence of residual Tup1 binding in the *ash1* mutant above a “No  
164 Tag” control (Fig 1C) suggests there may be another factor(s) that plays a lesser role in  
165 recruiting Tup1 to the *HO* promoter. This is consistent with observations at other genes,  
166 in which it is typical for multiple factors to contribute to Tup1 recruitment [42].

167 *HO* expression is cell-cycle regulated such that only a few transcripts are  
168 produced per cell cycle at the very end of G1 phase [9, 10]. The ordered recruitment of  
169 transcription factors and coactivators required for *HO* activation has previously been  
170 examined extensively by ChIP analysis in cells with a *GAL::CDC20* allele that can be  
171 arrested at G2/M and then released to allow synchronous progression through the cell  
172 cycle [7, 21, 48]. Three repressive DNA-binding factors, Ash1, Dot6, and Ume6, bind to  
173 the promoter after initial association of the Swi5 transcription factor but before *HO*  
174 expression [27]. We examined Tup1 binding using *GAL::CDC20* synchronization and  
175 found that, as expected, Tup1 associated with the *HO* promoter at the same time as  
176 Ash1, 25 min after the cells were released from the G2/M arrest (Fig 1D). Binding of  
177 Tup1 throughout the time course was vastly reduced in an *ash1* mutant, measured at  
178 both binding locations within the promoter (Fig 1D, S1).

179 To further confirm the role of Ash1 in recruitment of Tup1 to the *HO* promoter, we  
180 overexpressed *ASH1* from a multicopy YEp plasmid and examined Tup1 binding in cells  
181 transformed with either an empty YEp vector or with YEp-*ASH1*. Overexpression of the  
182 *ASH1* gene was confirmed by RT-qPCR analysis (Fig S2A), and ChIP analysis showed  
183 elevated Tup1 binding to the *HO* promoter (Fig 1E). Concomitant with the recruitment of  
184 additional Tup1, *HO* expression diminished (Fig S2B). A previous study demonstrated

185 that YEp-*ASH1* caused an 8-fold drop in a mating type switching bioassay in mother  
186 cells, which reflects *HO* expression [33].

187

### 188 **Ash1 is sufficient to recruit Tup1 to an exogenous location**

189 We next sought to determine whether Ash1 could recruit Tup1 to an ectopic  
190 location outside of the *HO* promoter. For this experiment, we constructed a Tup1-V5  
191 strain in which a LexA DNA-binding site was integrated upstream of the *HIS3* gene on  
192 chromosome XV (Fig 2A). We then integrated a LexA DNA-binding domain and a FLAG  
193 tag at the 3' end of the endogenous *ASH1* locus to create a fusion protein. Association  
194 of Ash1-LexA(DBD)-FLAG with the ectopic LexA binding site should increase Tup1-V5  
195 recruitment to that site if Ash1 is sufficient to recruit Tup1 (Fig 2A, right).

196 Ash1-LexA(DBD)-FLAG bound to both the LexA site upstream of *HIS3* and to the  
197 positive control promoter, *CLN3* (Fig 2B). Tup1-V5 binding at the ectopic *HIS3* site was  
198 minimal in the strain with native *ASH1*, but increased substantially in the strain  
199 containing Ash1-LexA(DBD)-FLAG (Fig 2C). As a comparison, Tup1-V5 bound to  
200 *TEC1*, the positive control promoter for Tup1 recruitment, in both strains (Figure 2C).  
201 We conclude that Ash1 is sufficient to recruit Tup1 to a location distinct from the *HO*  
202 promoter.

203

### 204 **Recruitment of Tup1 to the *HO* promoter by Ash1 is independent of Rpd3(L)**

205 Ash1 has been shown previously to repress *HO* transcription by virtue of  
206 association with the Rpd3(L) complex [6]. Ash1 is a substoichiometric member of  
207 Rpd(L), associating with the complex for only a portion of the cell cycle [6, 49]. The  
208 Tup1 corepressor also interacts with multiple histone deacetylases, including Rpd3 [43,  
209 46]. We therefore considered the possibility that Tup1 associates with the *HO* promoter  
210 through an interaction with Rpd3(L) rather than through direct association with Ash1.



211 To address the question of whether Rpd3(L) and Tup1 are recruited by Ash1  
212 independently and/or function independently for *HO* repression, we examined *HO* RNA  
213 expression in *rpd3* and *tup1* mutants using two methods. In the first method, we  
214 measured *HO* RNA in a bulk population of asynchronous cells (Fig 3A). In the second  
215 method, *HO-GFP* RNA was quantitated using single-cell time-lapse fluorescence  
216 microscopy, allowing the additional analysis of *HO* expression in mother versus  
217 daughter cells [50; Fig 3B ]. An *rpd3* null single mutant did not change expression of *HO*  
218 in the bulk population, but single-cell analysis demonstrated that *HO* was expressed in  
219 approximately 50% of the daughter cells. The reason for this difference is not known,  
220 but may result from measurement of processed RNA in the bulk population as opposed  
221 to newly formed transcripts in the single cell experiment.

222 Null alleles of *tup1* show delayed progression of cells through G1 and therefore  
223 are not useful for monitoring the effect on *HO* expression in late G1 [27]. For these  
224 analyses, we therefore used the *tup1(H575Y)* hypomorph that does not demonstrate a  
225 cell cycle delay. The *tup1(H575Y)* single mutant showed a small increase in *HO*  
226 expression in both asynchronous cells (from 100% wild type to 120% *tup1(H575Y)*; Fig  
227 3A) and in daughter cells in the single cell assay (from 2% wild type to 5% *tup1(H575Y)*;  
228 Fig 3B). In contrast to either single mutant, the double *rpd3 tup1(H575Y)* mutant had  
229 substantially increased *HO* expression in both assays, up to the level of an *ash1*  
230 mutant. In asynchronous cells, the level of expression in *rpd3 tup1(H575Y)* and *ash1*  
231 was roughly 2-fold that of wild type, suggesting that daughter cells had fully gained the  
232 ability to express *HO*. This hypothesis was confirmed by the single-cell experiment, in  
233 which 96% of *rpd3 tup1(H575Y)* and 94% of *ash1* cells displayed daughter cell  
234 expression (compared to only 2% in wild type; see red in Fig 3B). The level of  
235 expression in daughter cells in the *rpd3 tup1(H575Y)* mutant was higher than in *ash1*  
236 cells (1.63 vs. 1.11), which may explain the slight increase in *HO* expression in the bulk  
237 population in the double mutant relative to *ash1*. This could occur due to off-target

238 effects of the mutants that indirectly influence *HO* expression that are unrelated to their  
239 effects through Ash1.

240 The *HO* expression analyses demonstrate that mutation of both *RPD3* and *TUP1* is  
241 required to achieve the increased *HO* expression in daughters that occurs in an *ash1*  
242 mutant, suggesting Ash1 could recruit the complexes independently. The mechanisms  
243 of repression by Rpd3(L) and Tup1 may be similar or distinct, yet the overall effect of  
244 combination of the two corepressors is severely diminished expression in daughter cells  
245 relative to mother cells. To more directly test the hypothesis that Tup1 is recruited to *HO*  
246 independently of Rpd3(L), we examined binding of Tup1-V5 in a *sin3* mutant. The  
247 subunits of the Rpd3(L) complex all interact with the Sin3 scaffold protein, and thus *sin3*  
248 mutants lack a structurally intact complex [51]. If Tup1 association with *HO* requires  
249 Rpd3(L) in addition to Ash1, then Tup1 should not be recruited to *HO* in the *sin3* mutant.  
250 We found that Tup1-V5 binding was similar in wild type and a *sin3* mutant (Fig 3C),  
251 demonstrating that Tup1 recruitment to the *HO* promoter is independent of the Rpd3(L)  
252 complex. Due to the cell cycle delay and severe flocculation phenotype of *tup1* null  
253 mutants, we were unable to accurately examine the reverse prediction, that Rpd3  
254 recruitment is largely independent of Tup1. The *tup1(H575Y)* hypomorph still binds to  
255 the *HO* promoter (data not shown), and thus is not ideal for testing this hypothesis.  
256 However, the increased *HO* expression in the *RPD3 tup1(H575Y)* double mutant relative  
257 to the *RPD3* single mutant suggests that both complexes are independently important for  
258 repression, and that if Rpd3 association does occur via Tup1, then Tup1 must have  
259 another activity that makes a separate contribution to repression.

260

### 261 **Ash1 is found at many genomic sites, where it colocalizes with Tup1 and Rpd3**

262 More than a dozen DNA-binding transcription factors recruit Tup1 to promoters in  
263 yeast [39, 40]. However, many sites of Tup1 localization are not bound by any known  
264 Tup1 recruiters [42]. This suggests there are other as yet unknown DNA-binding

265 proteins that recruit Tup1, and Ash1 could be one of these factors. The only other  
266 known location of Ash1 binding is the *CLN3* promoter, where Ash1 cooperates with  
267 another daughter-specific factor, Ace2, to repress expression of *CLN3* in daughters [52,  
268 53]. To determine whether other sites of Ash1 binding exist, we performed ChIP-Seq  
269 with an Ash1-V5 strain. We also conducted parallel ChIP-Seq experiments with Tup1-  
270 V5 and Rpd3-V5 strains to assess how often Ash1 is present at sites that have both  
271 Rpd3 and Tup1 and whether there are subsets of promoters that are bound by  
272 Ash1/Tup1 or Ash1/Rpd3 pairs independently.

273 ChIP-Seq identified 250 peaks of Ash1 enrichment (Fig 4A, Table S3), confirming  
274 our hypothesis that Ash1 binds to additional sites throughout the *S. cerevisiae* genome.  
275 This number is fewer than for either Tup1 (832) or Rpd3 (1377), which is not surprising  
276 since Tup1 and Rpd3 are more general factors that act at a larger number of genes,  
277 recruited by multiple different transcription factors, of which Ash1 is only one example.  
278 We confirmed the results of the ChIP-Seq by qPCR of ChIP eluate for each factor at  
279 specific target promoters, including several targets from different chromosomes with  
280 varying levels of enrichment (Table S4). Values from qPCR correlated well with the  
281 ChIP-Seq values (Fig S3).

282 The vast majority of Ash1 sites (99%) also displayed binding of either Tup1 or  
283 Rpd3 or both, demonstrating that the correspondence between Ash1 and these two  
284 repressive factors extends beyond the *HO* gene (Fig 4A and B, S4). Overlap of all three  
285 factors (Ash1, Tup1, Rpd3) was observed at 209 Ash1 peaks (84%; Fig 4A). A heat  
286 map of Ash1 peaks, displaying log<sub>2</sub> fold enrichment of Ash1, Tup1 and Rpd3, shows  
287 varying levels of Tup1 and Rpd3 at different Ash1 locations (Fig 4C). Only a subset of  
288 the Tup1 and Rpd3 peaks overlap with those that are also bound by Ash1 (Fig 4A).  
289 Heat maps of Tup1 or Rpd3 peaks illustrate the substantial co-occupancy of these two  
290 factors, beyond the peaks that include Ash1 (Fig S5; See also Fig 4B and S4 for  
291 genome snapshots). Of the three factors, Rpd3 had the largest number of peaks and

292 therefore the greatest percentage of them that fail to overlap with the other two factors  
293 (Fig 4A). This was expected, based upon published studies of Rpd3 and the hypothesis  
294 that Rpd3 has a repressive role at specific promoters as well as a more general  
295 repressive function within open reading frames [54].

296

### 297 **Sites of co-occupancy of Ash1, Tup1 and Rpd3 are found within large intergenic** 298 **regions**

299 If Ash1 acts as a repressive transcription factor to recruit Tup1 and Rpd3 to  
300 locations other than *HO*, we would expect sites of Ash1, Tup1, and Rpd3 co-enrichment  
301 (ATR peaks) to be predominantly localized to intergenic regions, particularly those  
302 containing promoters, that would allow Ash1/Tup1/Rpd3 to regulate transcription of one  
303 or two genes from an upstream position. Consistent with this prediction, the majority of  
304 ATR peaks are positioned within intergenic regions (161 peaks, 77%; Table 1A, Table  
305 S3). Additional peaks are located within either 5' or 3' UTRs (29 peaks; 14%). Only a  
306 very small number of ATR peaks have a summit within an ORF (6%) or over a ncRNA  
307 (<1%). Of the ATR peaks localized to intergenic regions, the vast majority (97%) are  
308 positioned in promoters, either unidirectional or bidirectional (Table 1B, Table S3).  
309 Similarly, almost all ATR peaks within UTRs appear to be positioned upstream to the  
310 neighboring gene's promoter rather than near its terminator. Only a few intergenic and  
311 UTR peaks (5 total; 4 intergenic and 1 UTR) are located between convergent genes.  
312 Any potential role of these ATR sites in likely terminator regions is less clear.

Table 1. Characteristics of Ash1, Tup1, Rpd3 co-localized (ATR) peaks

A. Relationship to Known Features

| Location of Ash1 Peak <sup>a</sup> | Number of Peaks | Percent of Peaks |
|------------------------------------|-----------------|------------------|
| Intergenic                         | 161             | 77%              |
| UTR                                | 29              | 14%              |
| UTR/ORF Boundary                   | 5               | 2%               |
| ORF                                | 13 <sup>b</sup> | 6%               |
| ncRNA                              | 1               | <1%              |

<sup>a</sup> Determined by the position of the Ash1 peak summit.

<sup>b</sup> Eight of these are at the very 5' or 3' end of an ORF.

B. Relationship to Promoters

| Promoter Direction | Number of Peaks <sup>a</sup> | Percent of Peaks |
|--------------------|------------------------------|------------------|
| Single orientation | 69                           | 46%              |
| Divergent          | 75                           | 51%              |
| Convergent         | 4                            | 3%               |

<sup>a</sup> Only "Intergenic" peaks were used for analysis. Total number of peaks included is 148. Of the 161 peaks from Part A, 13 were removed because one of the genes flanking the intergenic region was a tRNA or snRNA.

313           Based on inspection of genome browser tracks, we noted that sites of ATR  
314 overlap appeared to occur in larger intergenic regions (Fig 4B, S4). We therefore  
315 compared the size distribution of all intergenic regions within the genome with those  
316 containing ATR peaks. The vast majority of yeast intergenic regions (close to 80%) are  
317 less than 500 nucleotides in length (Fig S6), when considering transcriptional start and  
318 stop sites. In contrast, only 12% of those with ATR peaks are within this size range.  
319 Nearly 40% of ATR-containing intergenic regions are between 500 and 999 nucleotides,

320 with the remaining approximately 50% greater than 1000 nucleotides in length (Fig S6).

321 Thus, ATR peaks are preferentially localized to larger promoter regions.

322 To determine the types of genes that could be regulated in part by Ash1  
323 recruitment of Tup1 and Rpd3, we examined the functional nature of all ORFs  
324 downstream of intergenic ATR peaks. The largest group of possible ATR-regulated  
325 genes with a common feature is those encoding proteins located at the cell periphery,  
326 including structural components of the cell wall, proteins involved in budding, cell  
327 surface glycoproteins and membrane transporter proteins of many types (Table S5).  
328 Several genes that control various aspects of the cell cycle are also downstream of ATR  
329 peaks, including the G1 cyclins *CLN1*, *CLN2* and *CLN3*, and the B-type cyclins *CLB1*  
330 and *CLB2*. Genes involved in pseudohyphal growth, meiosis and sporulation were  
331 identified, as well as genes encoding a variety of DNA-binding transcription factors.  
332 Some ATR peaks are located upstream of genes previously shown to be regulated by  
333 Tup1. Additional information on ORFs possibly regulated by ATR peaks can be found in  
334 S1 Appendix.

335

### 336 **Locations of Ash1, Tup1, and Rpd3 co-enrichment display differences in Ash1-** 337 **dependence for Tup1 and Rpd3 recruitment**

338 We assessed the contribution of Ash1 to Tup1 and Rpd3 recruitment at several  
339 genomic target sites to determine whether Ash1 is a predominant or minor recruiter at  
340 each location. Of the target sites we tested, *HO* displayed the greatest changes in Tup1  
341 recruitment between wild type and an *ash1* mutant or *ASH1* overexpression (Table S4).  
342 Sites upstream of other genes displayed moderate or small changes in Tup1 binding  
343 with alteration of *ASH1* levels. The relative level of Ash1 enrichment at each site did not  
344 predict the degree of change in Tup1 binding in the *ash1* mutant, and Tup1 binding was  
345 still detectable at all locations in the absence of Ash1. Most genes also showed a  
346 modest decrease in Rpd3 association upon removal of Ash1 (Table S4). Similar to

347 Tup1, Rpd3 binding was not eliminated. The most notable change in Rpd3 binding in an  
348 *ash1* mutant occurred at the *LTE1* gene, which is distinct from the other targets we  
349 examined because it is bound by Ash1 and Rpd3 but only weakly by Tup1. *LTE1* may  
350 represent a small class of genes in which Ash1 plays a more significant role in  
351 recruitment of the Rpd3 complex.

352 We also determined the level of Tup1 binding in a *sin3* mutant for this group of  
353 genes, to determine whether Tup1 association was dependent upon Rpd3 complex  
354 localization. Most did not show a substantial decrease in Tup1 binding in the *sin3*  
355 mutant, similar to *HO*, suggesting Rpd3 is not generally required for Tup1 recruitment  
356 (Table S4). One exception is the *UBC4/TEC1* location, which does not have substantial  
357 binding of Ash1, but showed a decrease in association of Tup1 in the *sin3* mutant. This  
358 suggests there could be some locations with Tup1/Rpd3 dual association in which Rpd3  
359 contributes to Tup1 recruitment.

360

### 361 **Ash1 and Tup1 associate with sequences encompassed within two nucleosomes** 362 **of the *HO* promoter**

363 In addition to identifying non-*HO* targets for Ash1, we planned to use the Ash1-  
364 V5 ChIP-Seq data to resolve some questions regarding the identity of Ash1 binding  
365 sites within the *HO* promoter. Our previous attempts to locate Ash1 binding sites based  
366 upon available data had been unsuccessful (See S2 Appendix for details). To identify  
367 an Ash1 binding motif from the genome-wide ChIP-Seq data, we used the central 100-  
368 bp surrounding the summit of the Ash1 peaks to search for motifs using the MEME-suite  
369 [55] and Homer [56]. The two most significant motifs identified by MEME are shown in  
370 Figure S7. Motif 1 has low complexity, consisting largely of poly-A stretches, and was  
371 identified in 28% of the Ash1 peak sequences searched (Table S3). This result is  
372 consistent with the presence of most Ash1 peaks within NDRs, which are frequently  
373 characterized by stretches of As and Ts [57]. Motif 2 resembles the binding site for

374 Mcm1 [58, 59] and was identified in 20% of the sequences (Table S3). Mcm1 is an  
375 alpha helix transcription factor of the MADS box family that regulates expression of  
376 many genes, often in conjunction with interacting partner proteins at adjacent binding  
377 sites [60, 61]. Sites for other transcription factors, such as Ume6, were identified in  
378 smaller subsets of peaks using Homer. No clear consensus motif emerged from either  
379 analysis or from additional searches using only ATR sites or Ash1 peaks within NDRs.  
380 We therefore suggest that Ash1 displays considerable flexibility in DNA recognition  
381 and/or that Ash1 binding to some locations is stimulated by interactions with other  
382 nearby DNA-binding factors (See S2 Appendix).

383         The possibility that Ash1 binds to a number of degenerate sequences suggests  
384 there may be multiple sites of Ash1 association at both the Upstream and Downstream  
385 Site locations of the *HO* promoter. These two peaks of Ash1/Tup1 binding coincide with  
386 the two nucleosomes of the *HO* promoter that flank the Swi5 binding sites [Nucleosome  
387 positions determined by MNase-Seq are shown in Fig 1A, 5; depicted by the yellow  
388 nucleosomes at -1890 and -1215 in Fig 5A]. To determine whether the sequence of  
389 these two nucleosomes contains most or all redundant sites of Ash1/Tup1 recruitment  
390 to the *HO* promoter, we replaced both nucleosome sequences, either singly or in  
391 combination, with the sequence of a positioned nucleosome from within the *CDC39*  
392 open reading frame. The sequence changes necessitated using different ChIP primers,  
393 indicated by the PCR amplicons upstream of the -1890 nucleosome and downstream of  
394 the -1215 nucleosome (Fig 5A). Replacement of the -1890 nucleosome slightly but  
395 significantly diminished binding of both Ash1 and Tup1 upstream of this nucleosome  
396 (“*HO* Left” Primers, Fig 5B and C) but not downstream of the -1215 nucleosome (“*HO*  
397 Right”, Fig 5B and C). Likewise, replacement of the -1215 nucleosome dramatically  
398 decreased binding of both Ash1 and Tup1 downstream of this nucleosome but not  
399 upstream of the -1890 nucleosome. Thus, substitution of a single nucleosome affects  
400 Ash1/Tup1 ChIP levels in the vicinity, but does not affect Ash1 or Tup1 at the more



401 distant relevant nucleosome. Substitution of both nucleosomes resulted in levels of  
402 Ash1/Tup1 binding at the “*HO* Right” location similar to replacement of the -1215  
403 nucleosome alone (Fig 5B and C, Right). Double nucleosome replacement also  
404 diminished Ash1 binding at the “*HO* Left” location to a level similar to the single -1890  
405 replacement, as expected (Fig 5B, Left). We did not observe the same effect for Tup1,  
406 because there was not an appreciable reduction in Tup1 binding at the “*HO* Left”  
407 location with substitution of both nucleosomes (Fig 5C, Left). This may be a  
408 consequence of substantially reduced binding of Tup1 at the Upstream Site relative to  
409 the Downstream Site (Fig 1B); the Upstream Site has a much smaller dynamic range,  
410 and it may be more difficult to detect slight differences in Tup1 binding due to sequence  
411 changes.

412

#### 413 **Sequence replacement of two *HO* nucleosomes has a greater effect than an *ash1*** 414 **mutation**

415 As noted earlier and detailed in S2 Appendix, we mutated a variety of putative  
416 Ash1 binding site motifs but saw only modest effects on either Ash1 or Tup1 binding, or  
417 on expression of the *HO* gene. Significantly, replacement of the -1215 nucleosome had  
418 a greater effect on Ash1/Tup1 ChIP levels than any of the mutation combinations we  
419 had previously tested. However, the decreased dynamic range at the Upstream Site  
420 made it more difficult to determine the significance of the diminished binding due to  
421 replacement of the -1890 nucleosome. We therefore examined whether the changes in  
422 Ash1/Tup1 binding in the nucleosome replacement strains caused expected increases  
423 in *HO* expression, reasoning that if most or all Ash1 association sites were eliminated  
424 by the substitutions, *HO* expression should increase to the level observed in an *ash1*  
425 mutant.

426 Substitution of the -1890 nucleosome alone did not significantly affect *HO*  
427 expression (Fig 5D), which is consistent with the observation that the level of Ash1/Tup1

428 binding is much less at this nucleosome than at the -1215 nucleosome (Fig 1A).  
429 Substitution of the -1215 nucleosome did increase *HO* expression (Fig 5D), but the level  
430 of increase was much less than might be expected, given the substantial loss of  
431 Ash1/Tup1 association at the downstream site (Fig 5B and C, Right). However,  
432 substitution of both nucleosomes led to a more dramatic increase in *HO* expression,  
433 similar to an *ash1* mutant (Fig 5D). This level of *HO* expression was higher than in the -  
434 1215 substitution alone. Thus, Ash1/Tup1 binding was reduced most substantially by  
435 the -1215 substitution and more so by the double mutant, while *HO* expression was  
436 affected only partially by the -1215 substitution but very substantially by the double  
437 substitution. These results suggest that binding of Ash1 occurs predominantly within the  
438 sequence of the -1890 and -1215 nucleosomes and that the -1890 nucleosome is nearly  
439 as critical for *HO* regulation as the -1215 nucleosome, though the level of binding is  
440 much less.

441

#### 442 **Sites of Ash1, Tup1, and Rpd3 co-occupancy are depleted for nucleosomes**

443 The experiments above demonstrate that at the *HO* promoter, the majority of  
444 Ash1 and Tup1 binding occurs to sequences that appear to be within nucleosomes,  
445 determined by MNase mapping of nucleosome density in logarithmically growing cells  
446 [5]. Many transcription factors associate with sites that are in regions depleted of  
447 nucleosomes (Nucleosome Depleted Regions, NDRs) and the presence of  
448 nucleosomes generally inhibits binding of transcription factors [1]. To determine whether  
449 the Ash1/Tup1 binding at *HO* is unique or whether Ash1 is more likely to bind within  
450 sites of higher nucleosome density than other transcription factors, we compared the  
451 ChIP-Seq enrichment signals for Ash1-V5, Tup1-V5 and Rpd3-V5 with genome-wide  
452 MNase-Seq data [5]. Heat maps displaying the nucleosome density from -750 to +750  
453 nucleotides relative to the summit of each Ash1 peak show that the central portion of  
454 the majority of Ash1 peaks lies within a region of low nucleosome density (Fig 6A).

455 Peaks near the bottom of the heat map are more similar to *HO* in that they overlap with  
456 higher nucleosome densities. Like most transcription factors, Ash1 binding therefore  
457 largely occurs within NDRs, but a subset of locations has Ash1 association over  
458 nucleosomes, as measured in a bulk population of cells.

459         Similar plots for Tup1-V5 and Rpd3-V5 peaks demonstrate that each of these  
460 factors also has a group of peaks that overlap with NDRs, though the fraction of peaks  
461 with NDRs is less than for Ash1-V5 (Fig 6B and 6C). Of the three factors, Rpd3-V5 is  
462 the least likely to be recruited to sites within NDRs, consistent with the observations that  
463 Rpd3 has a more broadly repressive role and a known enzymatic function targeting  
464 nucleosomes [54]. As expected, plotting nucleosome density for only the ATR co-  
465 localized peaks shows a pattern similar to that for Ash1, with the majority of peaks  
466 overlapping regions of less nucleosome density (Fig 6D). Many of the Tup1 and Rpd3  
467 peaks with low nucleosome density are thus sites of co-localization with Ash1. However,  
468 both factors clearly have additional binding locations within NDRs, consistent with the  
469 fact that both are recruited by transcription factors other than Ash1, which may also  
470 associate with sites of low nucleosome density.

471         To specifically identify ATR peaks other than *HO* that overlap with nucleosomes,  
472 we next categorized each intergenic ATR peak based upon the position of the Ash1  
473 peak summit relative to mapped NDRs and nucleosomes. Peaks were placed into one  
474 of three categories (Table 2, Table S3). “NDR” or “Nucleosome” peaks are those for  
475 which the summit of the Ash1 peak intersects with a mapped NDR or nucleosome,  
476 respectively. “Nucleosome/NDR Boundary” peaks are those located at the edge of a  
477 nucleosome or NDR, such that the summit of the peak lies within 25-bp of the edge of a  
478 mapped nucleosome. Some peaks were discarded from the analysis due to poorly-  
479 defined nucleosomes or insufficient MNase-Seq coverage from redundant sequence.

480

Table 2. Relationship of ATR Intergenic Peaks to Nucleosome Density

|                                        | Number of Peaks <sup>a</sup> | Percent of Peaks |
|----------------------------------------|------------------------------|------------------|
| Nucleosome Depleted Region (NDR)       | 99                           | 74%              |
| Nucleosome / NDR Boundary <sup>b</sup> | 18                           | 13%              |
| Nucleosome                             | 17                           | 13%              |

<sup>a</sup> The 161 “Intergenic” ATR peaks from Table 1A were used for analysis. 24 ATR peaks could not be scored due to location within a region with poorly defined nucleosomes. An additional three were double peaks, in which only the larger of the two peaks was scored. The total shown here is 134.

<sup>b</sup> Peaks for which the Ash1 summit was within 25-bp of the edge of a mapped nucleosome.

481            Three-quarters of the intergenic ATR peaks were positioned within NDRs (Table  
482 2). The remainder were split between those that showed localization at an  
483 NDR/Nucleosome boundary and those positioned within nucleosomes. The type of ATR  
484 peaks similar to those at *HO* (Fig 1A) are thus in the minority, with only 13% of ATR  
485 intergenic peaks in which the sites of co-localization are found within mapped  
486 nucleosomes. Examples of each peak type are shown in Figure S8.

487

#### 488 **Association of Ash1 and Tup1 with the *HO* promoter requires the Swi5 activator** 489 **and nucleosome eviction**

490            Since a minority of Ash1 peaks are localized within nucleosomes, we considered  
491 the possibility that the Ash1 may not be physically able to bind to sequences within a  
492 nucleosome. Given that most Ash1 binding occurs within NDRs, a more likely scenario  
493 may be that at the “Nucleosome” sites, eviction would transiently reveal the Ash1  
494 binding site, allowing Ash1 to bind and influence transcription.

495            We investigated this possibility using the *HO* gene, since previous studies have  
496 shown that *HO* promoter nucleosomes are evicted as the cell cycle progresses [7]. In

497 cells synchronized by a *GAL::CDC20* arrest and release protocol, Ash1 binds to the *HO*  
498 promoter at 25 min after the release point [Fig 7A; 27]. This occurs 5 min after the Swi5  
499 transcription factor binds to the promoter (20 min following release) but before *HO*  
500 transcription occurs [starting at 30 minutes and peaking at 50 minutes following release;  
501 Fig 7A; 7, 21]. Binding of Swi5 is the initial event that catalyzes a series of steps leading  
502 to activation of *HO* transcription. Swi5 recruits coactivators to the promoter, including  
503 the SWI/SNF chromatin remodeling complex, causing eviction of nucleosomes  
504 throughout and beyond URS1 [7, 62]. The -1890 and -1215 nucleosomes containing  
505 Ash1 sites of association have already been evicted from URS1 at the 25 min time point  
506 when Ash1 binds [7, 62]. Thus, it is likely that Ash1 is able bind to the *HO* promoter at  
507 this particular time because the nucleosomes covering its binding sites have been  
508 removed. If so, Ash1 may be similar to other transcription factors whose binding is  
509 restricted to NDRs.

510 If Ash1 requires nucleosome eviction at the *HO* promoter to promote binding, we  
511 expect that if we remove the capacity for nucleosome eviction, Ash1 should be  
512 incapable of binding. To examine this possibility, we constructed strains for measuring  
513 Ash1 binding in the absence of the Swi5 pioneer transcription factor. Without Swi5,  
514 there is no recruitment of SWI/SNF and no nucleosome eviction at the *HO* promoter [7].  
515 We constructed strains with Swi5 binding site mutations a3 and b3 [63], which eliminate  
516 both Swi5 binding and *HO* expression, and assessed whether Ash1 and Tup1 could  
517 bind to the *HO* promoter in these conditions. ChIP assays showed that both proteins  
518 were virtually eliminated from the *HO* promoter in the strain with mutated Swi5 binding  
519 sites (Fig 7B). In contrast, the Ume6 repressive transcription factor, which associates  
520 with the *HO* promoter at a site that lies at least partially within a linker region [27], was  
521 not as strongly affected.

522 If Ash1 and Tup1 are unable to associate with the *HO* promoter in the absence of  
523 Swi5 because a nucleosome excludes them from binding, then experimental removal of

524 the nucleosome should restore binding even in the presence of mutated Swi5 binding  
525 sites that prevent SWI/SNF recruitment. We therefore constructed a strain in which we  
526 introduced Reb1 binding sites within the -1215 nucleosome (Fig 7C; labeled “Nucl  $\Delta$ ”).  
527 Reb1 binding sites exclude the formation of nucleosomes [64, 65]. We first performed  
528 histone H3 ChIP analysis to demonstrate that the Reb1 sites had changed the  
529 nucleosome density around the -1215 region. Primer sets 1 and 4, which lie outside of  
530 the -1215 nucleosome sequence, displayed either modest reduction (set 1, orange) or  
531 no change (set 4, purple) in H3 ChIP upon addition of the Reb1 binding sites (Fig 7D;  
532 compare “Swi5 Site Mut” to “Swi5 Site Mut Nucl  $\Delta$ ”). In contrast, primer sets 2 and 3,  
533 which overlap the -1215 nucleosome, showed dramatically decreased H3 ChIP  
534 enrichment when Reb1 binding sites were added (Fig 7D). Thus, the Reb1 binding sites  
535 were successful in reducing nucleosome occupancy over the nucleosome that contains  
536 the Ash1 downstream *HO* binding site(s).

537 We next measured Ash1 binding to these mutant promoters (Fig 7E). The Swi5  
538 binding site mutations eliminated Ash1 binding, in agreement with the data in Fig 7B.  
539 Importantly, the reduction in nucleosome density caused by the Reb1 binding sites  
540 partially restored Ash1 binding, despite the absence of Swi5 and recruitment of the  
541 SWI/SNF remodeler. The Reb1 site eliminated the -1215 nucleosome, but the -1890  
542 remained; synergy in binding between Ash1 at the -1890 and -1215 regions could  
543 provide a possible explanation for why the Reb1 site insertion only partially restored  
544 Ash1 binding. These experiments suggest that Ash1 binding to the *HO* promoter  
545 requires the nucleosomes covering its binding sites to be evicted, thereby exposing the  
546 binding sites. Thus, the *HO* promoter must undergo its initial activation steps in order for  
547 the Ash1 and Tup1 repressors to bind. This adds another level of complexity to our  
548 knowledge of *HO* promoter regulation and suggests an interplay between activation and  
549 repression factors is necessary for appropriate *HO* expression.

550

551 DISCUSSION

552 We have shown previously that the Tup1 corepressor functions as a negative  
553 regulator of *HO* expression, and here we demonstrate that Ash1 is the predominant  
554 recruiter of Tup1 to the *HO* promoter. ChIP-Seq revealed that Ash1 binds to many  
555 additional sites throughout the *S. cerevisiae* genome and colocalizes with Tup1 at 95%  
556 of these sites, most of which are also bound by Rpd3 (Fig 4A). Characterization of these  
557 sites provides insight into the genome-wide role of Ash1/Tup1/Rpd3 and aids in  
558 understanding the complexity and unique nature of *HO* promoter regulation.

559

560 **Ash1 provides a mechanism for differential expression between mother and**  
561 **daughter cells via recruitment of Tup1 and Rpd3**

562 Sites of Ash1/Tup1/Rpd3 association tend to be located within large intergenic  
563 regions (Fig S6), suggesting they contribute to regulation of some of the more complex  
564 yeast promoters. Ash1 appears to be one of multiple contributors to Tup1 and Rpd3-  
565 mediated repression, as loss of Ash1 often caused only slight to moderate reductions in  
566 Tup1 and Rpd3 association with the promoters we tested (Table S4). This data supports  
567 previous studies showing that deletions of individual recruiters do not change the  
568 genome-wide Tup1 binding pattern, and the number of recruiter binding sites at a given  
569 location correlates with the occupancy of Tup1 [42]. Tup1 and Rpd3-regulated genes  
570 may therefore have the capacity to respond to multiple different pathways, with each  
571 repressor directing association of Tup1 and/or Rpd3 under a unique set of conditions.  
572 Many Tup1-Cyc8 recruiters respond to environmental signals; others limit Tup1  
573 repression to a particular cell type. Because Ash1 protein is present predominantly in  
574 daughter cells, it is predicted to have much less of a repressive effect in mother cells;  
575 thus, Ash1 contributes a unique cell-type specific mode of Tup1 and/or Rpd3 action.

576 We identified the ORFs downstream of sites of Ash1 localization, for which Ash1  
577 could play a regulatory role (Table S5). For some of these genes, we can speculate how

578 a repressor localized predominantly in daughter cells might be important, though for  
579 many genes it is not clear how a mother-daughter distinction would be advantageous.  
580 Ash1 repression of genes encoding cell wall and cell surface proteins, some of which  
581 are involved in budding and cytokinesis (Table S5), could contribute to the polarity that  
582 is established between mother and daughter cells. Promoters of some cell cycle  
583 regulators also have Ash1 bound (Table S5). Daughter cells progress through the cell  
584 cycle at a different rate than mother cells. Reduced expression of these possible Ash1  
585 target genes, such as *CLN2* and *CDC6*, could contribute to the cell cycle delay in  
586 daughter cells. Ash1 may also affect transcription of genes indirectly by tailoring the  
587 level of expression of their transcription factors in mother versus daughter cells. Multiple  
588 genes encoding DNA-binding factors have Ash1 localized to their upstream region,  
589 including several that recruit Tup1-Cyc8 (Table S5). In this way, Ash1 could indirectly  
590 influence the relative expression levels in mothers and daughters for a large number of  
591 genes.

592

593 **Ash1's recruitment of both Rpd3 and Tup1 may explain its broad spatial and**  
594 **temporal effect on *HO* transcription**

595 The *HO* promoter appears to have characteristics that are not exhibited by the  
596 majority of other locations of ATR binding. First, *HO* is the only gene downstream of an  
597 ATR peak that is known to be expressed exclusively in mother cells. Mother-specific  
598 expression of the Ho endonuclease is critical to ensure that only one cell switch mating  
599 type, allowing efficient production of a diploid from a germinating spore. For most Ash1-  
600 regulated genes, it is likely that a higher level of expression in mother cells than in  
601 daughter cells, without expression being completely "off" in daughters, is advantageous  
602 for growth. Second, Tup1 binding to the *HO* promoter is strongly Ash1-dependent (Fig  
603 1), while this is not true for most genes bound by Ash1 and Tup1 (Table S4). This  
604 suggests that Tup1, along with Rpd3, is a necessary component of strong repression of



605 *HO* in daughter cells. Genes that also need to respond to environmental conditions  
606 necessitate the use of additional DNA-binding repressors, leading to the observed  
607 redundancy of DNA-binding factors that recruit Tup1 and Rpd3. Third, *HO* has two  
608 peaks of Ash1 binding, both of which are necessary for obtaining the appropriate level  
609 of *HO* expression (Fig 1A, 5). The reason for both peaks is not clear, but could involve  
610 limiting the bidirectional nucleosome eviction from the Swi5 sites [62]. Nine other sites  
611 throughout the genome share this feature of two peaks, some of which are located  
612 between parallel ORFs, upstream of a single gene and/or approximately one kb or less  
613 apart, similar to *HO* (listed as “Double” in Table S3).

614 The fourth and final feature that distinguishes *HO* from most other sites of  
615 association of Ash1, Tup1 and Rpd3 is the observation that the ATR binding sites are  
616 concealed by nucleosomes for much of the cell cycle. The majority of ATR sites are  
617 depleted of nucleosomes, suggesting Ash1 is similar to many transcription factors,  
618 which preferentially bind within NDRs as opposed to binding sites positioned within  
619 nucleosomes [66]. Ash1/Tup1 binding to the *HO* promoter was substantially diminished  
620 under conditions in which the nucleosomes covering the association sites could not be  
621 evicted, and binding was restored when nucleosomes were depleted in the absence of  
622 the normally required activators and coactivators (Fig 7). This suggests other Ash1 sites  
623 that are concealed likely require dynamic modification or removal of the covering  
624 nucleosome at a particular time point to allow Ash1 binding and subsequent recruitment  
625 of Tup1 and/or Rpd3. Aside from *HO*, the mechanisms of activation of these promoters  
626 and their associated factors are largely unknown. Investigation of the conditions in  
627 which these sites are revealed could provide further insight concerning the interplay  
628 between chromatin and Ash1 repression.

629

630 **The timing of nucleosome eviction may be important for asymmetric *HO***  
631 **expression**

632 For *HO*, all of these features are likely necessary to constrict expression to a  
633 narrow window of the cell cycle, only in mother cells. Expression of the Ho  
634 endonuclease outside of this window could be detrimental or counterproductive to the  
635 cell due to inappropriate cleavage of DNA. The details concerning the timing of Swi5  
636 binding, exposing of binding sites concealed by nucleosomes, and subsequent Ash1  
637 association, all have important consequences for the asymmetric expression of *HO* in  
638 mothers and daughters [4]. Swi5 enters the nucleus as cells enter anaphase and binds  
639 to the *HO* promoter. Recruitment of the SWI/SNF chromatin remodeler by Swi5 results  
640 in nucleosome eviction and exposure of the Ash1 binding sites, and these events  
641 probably occur at the time of cytokinesis. In mother cells, the small amount of Ash1 that  
642 binds causes the promoter to be more resistant to activation, making it fully dependent  
643 on Gcn5 [26]. In daughter cells, the large amount of bound Ash1 prevents the promoter  
644 from being activatable, presumably because Ash1 recruits Tup1, which blocks  
645 coactivator recruitment [41], and the Rpd3 deacetylase complex.

646 Ash1 is a very unstable protein and is rapidly cleared from the nucleus [67, 68].  
647 Experiments show that the effects of Ash1 persist long after the protein is degraded,  
648 and at promoter sites far distant from where it binds. In an *ash1* mutant, there is  
649 increased association of SWI/SNF, Mediator, and SBF, and evicted nucleosomes are  
650 not repopulated within the same time scale as in wild type cells [26, 62]. Ash1's ability to  
651 recruit both Rpd3 and Tup1, which affect the coactivators and thereby downstream  
652 promoter events, likely explains the extent and duration of Ash1's impact. Further  
653 studies will be required to fully understand the mechanisms of repression by Ash1.

654

### 655 **A requirement for nucleosome eviction for binding of repressors suggests an** 656 **interrelationship between activation and repression**

657 Our results demonstrate that the Ash1 repressor requires initial *HO* promoter  
658 activation steps for binding. This suggests that achieving appropriate *HO* expression

659 requires not simply a balance of positive and negative transcriptional activities but also  
660 a coordination between them. The necessity to restrict *HO* expression to only a few  
661 rounds of transcription within a short window of the cell cycle may be the driving factor  
662 responsible for integration of activation and repression.

663         The observation that Ash1 is unable to associate with the *HO* promoter until  
664 nucleosomes have been evicted illustrates that dynamic modification of nucleosomes  
665 can be required for repression as well as activation. If the mode of Ash1 binding at other  
666 intergenic sites concealed by nucleosomes is similar to the *HO* promoter, our data  
667 suggests that Ash1 binding to these promoters is also restricted to a short time within  
668 the cell cycle or to specific environmental conditions. These genes could therefore  
669 represent additional examples of a requirement for activator binding and nucleosome  
670 eviction prior to recruitment of repressors and corepressors. Such a scenario may be  
671 even more prevalent in higher eukaryotic promoters, some of which require many  
672 activating and repressing transcriptional regulators that associate with large enhancer  
673 regions [69].

674         Coordination of positive and negative transcriptional activities could allow a fine  
675 tuning of the repression response that may be necessary in cases where the activator is  
676 present for a brief period of time or is relatively weak and unable to overcome robust  
677 repression already established at the promoter. The repressor would thus temper the  
678 coactivator response, and, in a situation such as *HO*, ensure that detrimental levels of  
679 transcript are not produced. At regulated promoters, the linkage of activation and  
680 repression may also allow activation to trigger a “reset” of the promoter for repression  
681 until the next cell cycle. These roles of limiting transcriptional response and resetting the  
682 promoter are likely not unique to the Ash1 repressor specifically, as many other proteins  
683 that recruit Tup1 and Rpd3 to different sets of genes could perform similar functions.  
684 The apparent redundancy of sites of recruitment for Tup1 and Rpd3 to promoters and  
685 the ability of some of these sites to be regulated by nucleosome placement thus allows

686 genes to not only respond to different environmental conditions and cellular stresses but  
687 also to combine accessible sites and concealed, regulatable sites within the same  
688 promoter. These options for building a complex promoter may provide an important  
689 level of flexibility in the transcription of highly regulated genes.

690

## 691 METHODS

### 692 **Strain construction**

693 All yeast strains used are listed in Supplemental Table S1 and are isogenic in the  
694 W303 background (*leu2-3,112 trp1-1 can1-100 ura3-1 ade2-1 his3-11,15*) [70].  
695 Standard genetic methods were used for strain construction [71-74]. The *ASH1-V5* C-  
696 terminal epitope tag has been described previously [27]. The *TUP1-V5* and *RPD3-V5*  
697 alleles were constructed as described [73], by integrating a V5 epitope tag with a  
698 *HIS3MX* marker from pZC03 (pFA6a-TEV-6xGly-V5-HIS3MX), provided by Zaily  
699 Connell and Tim Formosa (plasmid #44073; Addgene). For strains with the *HO* -1890  
700 nucleosome replacement, *HO* promoter sequence from -1972 to -1826 was deleted and  
701 replaced with *CDC39* ORF sequence from +2583 to +2729. For strains with the *HO* -  
702 1215 nucleosome replacement, *HO* promoter sequence from -1288 to -1139 was  
703 deleted and replaced with *CDC39* ORF sequence from +3072 to +3221. Strains with the  
704 LexA site upstream of *HIS3* are derived from strain L40 [75]. A plasmid with the  
705 *LexA(DBD)-NLS-3xFLAG::HphMX* construct was made in several steps (details  
706 available on request), and was used to tag the C-terminus of the chromosomal *ASH1*  
707 gene [73]. Strains labeled as “Swi5 Site Mut” have an *HO* promoter sequence with  
708 mutations of both Swi5 binding sites A and B [a3 and b3 mutations, 63]. For the strain  
709 labeled as “Nucl  $\Delta$ ”, *HO* sequences from -1268 to -1262 and from -1194 to -1189 were  
710 replaced with Reb1 binding sites (TTACCC), which lead to nucleosome depletion [65].

711

### 712 **RNA expression and Chromatin Immunoprecipitation (ChIP) analysis**

713 For logarithmic cell collection ( $OD_{660}$  of 0.6 to 0.8), cells were grown at 30°C in  
714 YPA medium (1% yeast extract, 2% bactopectone, 0.002% adenine) supplemented with  
715 2% dextrose [72]. Cell cycle synchronization was performed by galactose withdrawal  
716 and readdition with a *GALp::CDC20* strain grown at 25°C in YPA medium containing 2%  
717 galactose and 2% raffinose [21]. Synchrony was confirmed by microscopic analysis of  
718 budding indices and analysis of cell-cycle regulated mRNAs (data not shown).

719 RNA was isolated from either logarithmically growing cells or synchronized cells,  
720 and *HO* mRNA levels were measured by reverse transcription quantitative PCR (RT-  
721 qPCR), as described previously [76]. *HO* RNA expression was normalized to that of  
722 *RPR1*. *RPR1* encodes the RNA component of RNase P and is transcribed by RNA  
723 polymerase III. Most genetic manipulations that affect RNA Pol II transcription do not  
724 affect transcription of *RPR1*. For logarithmic cells, normalized *HO* RNA expression  
725 values were graphed relative to wild type (WT) expression.

726 ChIPs were performed as described [21, 76], using mouse monoclonal  
727 antibodies to the V5 epitope (SV5-Pk1; Abcam) or the FLAG epitope (M2; Sigma) and  
728 antibody-coated magnetic beads (Pan Mouse IgG beads; Life Technologies). Cells from  
729 either logarithmically growing cells or synchronized cells were cross-linked in 1%  
730 formaldehyde for 20 min at room temperature (*Ash1*, *Swi5*) or overnight at 4°C (*Tup1*)  
731 and quenched with 125 mM glycine. ChIP signals were calculated as detailed in the  
732 Figure Legends. For some experiments, the concentration of ChIP DNA at the relevant  
733 target gene was normalized simply to its corresponding Input DNA and also to a “No  
734 Tag” control. For others, samples were first normalized to either an expected negative  
735 reference control (IGR-I intergenic region of chromosome I and IGR-V intergenic region  
736 of chromosome V) or a known positive reference control (*CLN3* for *Ash1*, *TEC1* for  
737 *Tup1*, *INO1* for *Ume6*). For figures using a negative reference control, values were  
738 graphed relative to the No Tag control. For figures using a positive reference control,  
739 values were graphed relative to the wild type control.

740 Quantitative PCR (qPCR) experiments for both RNA and ChIP analysis were run  
741 on a Roche Lightcycler 480 or a ThermoFisher QuantStudio 3, and concentrations were  
742 determined using wild type cDNA or ChIP input for in-run standard curves via the E-  
743 method [77]. Error bars represent the standard deviation of at least three biological  
744 samples. The Student's t-test was used to determine significance of changes in *HO*  
745 expression and factor binding between different genotypes. For all comparisons  
746 mentioned in the Results and Discussion, *p*-values are indicated in the figures. For ChIP  
747 tiling PCR across the *HO* promoter (Fig 1A and 1C) and time course experiments, a  
748 single sample is shown for simplicity (Fig 1D and Fig 7). Triplicate biological samples for  
749 the time course ChIPs in Fig 1D are shown in Fig S1. Fig 7 contains a single sample for  
750 Swi5-V5, Ash1-V5 ChIP and *HO* mRNA, all of which have been confirmed via numerous  
751 previous experiments [6, 7, 27, 76].

752

### 753 **ChIP-Seq and genomic data analysis**

754 Chromatin isolated from individual, independently collected Ash1-V5, Tup1-V5 or  
755 Rpd3-V5 cell pellets was used for multiple ChIPs, performed as described above, which  
756 were then pooled for each replicate. Libraries were prepared for triplicate ChIP samples  
757 and a single input sample for each strain using the New England Biolabs NEBNext  
758 ChIP-Seq Library Prep Reagent Set with dual index primers. Sequencing was  
759 performed with an Illumina NovaSeq 6000, 150-bp paired end run (University of Utah  
760 High Throughput Genomics Facility). Fastq files were aligned to the genome (UCSC  
761 sacCer3) using Novocraft Novoalign version 3.8.1 [78], giving primer adapters for  
762 trimming, and allowing for 1 random, multi-hit alignment. Between 10-20 million  
763 fragments were mapped with an alignment rate of 98.4-99.7%, and a Pearson  
764 correlation >0.9 between replicates based on genomic coverage.

765 Samples were then processed with MultiRepMacsChIPSeq pipeline version 8  
766 [79]. Alignments over mitochondrial, 2-micron, rDNA, and telomeric regions were

767 discarded from analysis. Excessive duplicate alignments (36-56%) were randomly  
768 subsampled to a uniform 20% for each sample. Replicates were depth-normalized,  
769 averaged together, and peak calls generated with a minimum size of 200 bp, gap size of  
770 100 bp, and minimum q-value statistic of 2. Peaks were further filtered using the peak  
771 score (sum of q-value statistic) using a minimum cutoff of 100. Peaks were annotated  
772 by intersection using bedtools [80] with interval files of either genes or intergenic  
773 regions.

774 Data for heat map analysis was collected with BioToolBox `get_relative_data` with  
775 the peak summit using the generated Log2 Fold Enrichment and nucleosome coverage  
776 bigWig files, in 25 windows of 20 bp flanking the summit. Heat maps were generated  
777 using `pHeatmap` [81] in custom R scripts.

778 To determine the position of genome-wide nucleosomes, depth-normalized  
779 (Reads Per Million) nucleosomal coverage representing the middle 50% of nucleosomal  
780 fragments was generated from [5] using BioToolBox `bam2wig` version 1.67 [82] by  
781 shifting the alignment start position by 37 bp and extending coverage for 76 bp. Mapped  
782 nucleosome calls were made with the BioToolBox-Nucleosome version 1 [83] package,  
783 `map_nucleosomes` script with a threshold of 2. Nucleosome calls were filtered with the  
784 `verify_nucleosome_mapping` script using maximum overlap of 35 bp and `recenter`  
785 option. This identified 61,802 nucleosomes. Nucleosomal Depleted Regions were  
786 generated as the reciprocal of called nucleosomes using bedtools [80] `complement`  
787 function, which were then filtered for length (75-600 bp) and low residual nucleosome  
788 coverage (mean RPM coverage < 2). Nucleosomal edges were generated as intervals  
789 25 bp internal and 10 bp external to the edge coordinates of called nucleosome  
790 intervals. ChIP peaks were intersected with nucleosome and NDR intervals using  
791 bedtools.

792 Motif analysis of Ash1 peaks was performed using a 100 bp sequence interval  
793 ( $\pm 50$  bp from the called summit of the peak). Motifs displayed in Fig S7 were identified

794 using the MEME-suite [55], with a first order background model. Additional motif  
795 analysis was performed with Homer software version 4.10.1 [56, 84], using intergenic  
796 intervals as a custom background file. Additional searches were performed using only  
797 ATR peaks or ATR peaks found in NDRs.

798

### 799 **Data availability**

800 Strains and plasmids are available upon request. Table S1 lists the strains used  
801 in this study, and Table S2 lists the primers used for ChIP and RT-qPCR analysis.  
802 ChIP-Seq data are available at the Gene Expression Omnibus with the accession  
803 number GSE158180.

804

### 805 ACKNOWLEDGMENTS

806 We thank Tim Formosa and Bobby Yarrington for advice throughout the course  
807 of these experiments and Tim Formosa and Dean Tantin for comments on the  
808 manuscript. We thank Zaily Connell, Tim Formosa, Mark Hochstrasser, Anita Sil, and  
809 Warren Voth for providing plasmids used in strain construction. We also thank Frank  
810 Pugh for communicating unpublished results and David Virshup for a yeast strain. This  
811 work was supported by National Institutes of Health grants GM121858 and GM121079,  
812 awarded to L.B. and D.J.S., respectively.

813

### 814 REFERENCES

- 815 1. Li B, Carey M, Workman JL. The role of chromatin during transcription. *Cell*.  
816 2007;128(4):707-19.
- 817 2. Lin A, Du Y, Xiao W. Yeast chromatin remodeling complexes and their roles in  
818 transcription. *Curr Genet*. 2020;66(4):657-70.
- 819 3. Cairns BR. The logic of chromatin architecture and remodelling at promoters.  
820 *Nature*. 2009;461(7261):193-8.



- 821 4. Stillman DJ. Dancing the cell cycle two-step: regulation of yeast G1-cell-cycle  
822 genes by chromatin structure. *Trends Biochem Sci.* 2013;38(9):467-75.
- 823 5. McCullough LL, Pham TH, Parnell TJ, Connell Z, Chandrasekharan MB, Stillman  
824 DJ, et al. Establishment and Maintenance of Chromatin Architecture Are  
825 Promoted Independently of Transcription by the Histone Chaperone FACT and  
826 H3-K56 Acetylation in *Saccharomyces cerevisiae*. *Genetics.* 2019;211(3):877-92.
- 827 6. Takahata S, Yu Y, Stillman DJ. Repressive Chromatin Affects Factor Binding at  
828 Yeast *HO* (Homothallic Switching) Promoter. *J Biol Chem.* 2011;286(40):34809-  
829 19.
- 830 7. Takahata S, Yu Y, Stillman DJ. FACT and Asf1 regulate nucleosome dynamics  
831 and coactivator binding at the *HO* promoter. *Mol Cell.* 2009;34(4):405-15.
- 832 8. Yarrington RM, Rudd JS, Stillman DJ. Spatiotemporal cascade of transcription  
833 factor binding required for promoter activation. *Mol Cell Biol.* 2015;35(4):688-98.
- 834 9. Nasmyth K. Molecular analysis of a cell lineage. *Nature.* 1983;302:670-6.
- 835 10. Miura F, Kawaguchi N, Yoshida M, Uematsu C, Kito K, Sakaki Y, et al. Absolute  
836 quantification of the budding yeast transcriptome by means of competitive PCR  
837 between genomic and complementary DNAs. *BMC Genomics.* 2008;9:574.
- 838 11. Jensen RE, Sprague GF, Jr., Herskowitz I. Regulation of yeast mating-type  
839 interconversion: feedback control of *HO* gene by the mating-type locus. *Proc Natl*  
840 *Acad Sci USA.* 1983;80:3035-9.
- 841 12. Strathern JN, Klar AJ, Hicks JB, Abraham JA, Ivy JM, Nasmyth KA, et al.  
842 Homothallic switching of yeast mating type cassettes is initiated by a double-  
843 stranded cut in the *MAT* locus. *Cell.* 1982;31(1):183-92.
- 844 13. Breeden L, Nasmyth K. Similarity between cell-cycle genes of budding yeast and  
845 fission yeast and the Notch gene of *Drosophila*. *Nature.* 1987;329:651-4.

- 846 14. Stillman DJ, Bankier AT, Seddon A, Groenhout EG, Nasmyth KA.  
847 Characterization of a transcription factor involved in mother cell specific  
848 transcription of the yeast *HO* gene. EMBO J. 1988;7(2):485-94.
- 849 15. Tebb G, Moll T, Dowser C, Nasmyth K. SWI5 instability may be necessary but is  
850 not sufficient for asymmetric *HO* expression in yeast. Genes Dev. 1993;7:517-28.
- 851 16. Yu Y, Yarrington RM, Chuong EB, Elde NC, Stillman DJ. Disruption of promoter  
852 memory by synthesis of a long noncoding RNA. Proc Natl Acad Sci U S A.  
853 2016;113(34):9575-80.
- 854 17. Nasmyth K. At least 1400 base pairs of 5'-flanking DNA is required for the correct  
855 expression of the *HO* gene in yeast. Cell. 1985;42:213-23.
- 856 18. Taba MRM, Muroff I, Lydall D, Tebb G, Nasmyth K. Changes in a SWI4,6-DNA-  
857 binding complex occur at the time of *HO* gene activation in yeast. Genes Dev.  
858 1991;5:2000-13.
- 859 19. Nasmyth K, Adolf G, Lydall D, Seddon A. The identification of a second cell cycle  
860 control on the *HO* promoter in yeast: cell cycle regulation of SWI5 nuclear entry.  
861 Cell. 1990;62:631-47.
- 862 20. Cosma MP, Tanaka T, Nasmyth K. Ordered recruitment of transcription and  
863 chromatin remodeling factors to a cell cycle- and developmentally regulated  
864 promoter. Cell. 1999;97(3):299-311.
- 865 21. Bhoite LT, Yu Y, Stillman DJ. The Swi5 activator recruits the Mediator complex to  
866 the *HO* promoter without RNA polymerase II. Genes Dev. 2001;15(18):2457-69.
- 867 22. Jiang C, Pugh BF. A compiled and systematic reference map of nucleosome  
868 positions across the *Saccharomyces cerevisiae* genome. Genome biology.  
869 2009;10(10):R109.
- 870 23. Brogaard K, Xi L, Wang JP, Widom J. A map of nucleosome positions in yeast at  
871 base-pair resolution. Nature. 2012;486(7404):496-501.

- 872 24. Pollard KJ, Peterson CL. Role for *ADA/GCN5* products in antagonizing  
873 chromatin-mediated transcriptional repression. *Mol Cell Biol.* 1997;17(11):6212-  
874 22.
- 875 25. Perez-Martin J, Johnson AD. Mutations in chromatin components suppress a  
876 defect of Gcn5 protein in *Saccharomyces cerevisiae*. *Mol Cell Biol.*  
877 1998;18(2):1049-54.
- 878 26. Mitra D, Parnell EJ, Landon JW, Yu Y, Stillman DJ. SWI/SNF binding to the *HO*  
879 promoter requires histone acetylation and stimulates TATA-binding protein  
880 recruitment. *Mol Cell Biol.* 2006;26(11):4095-110.
- 881 27. Parnell EJ, Stillman DJ. Multiple Negative Regulators Restrict Recruitment of the  
882 SWI/SNF Chromatin Remodeler to the *HO* Promoter in *Saccharomyces*  
883 *cerevisiae*. *Genetics.* 2019;212(4):1181-204.
- 884 28. Nasmyth K, Stillman D, Kipling D. Both positive and negative regulators of *HO*  
885 transcription are required for mother-cell-specific mating-type switching in yeast.  
886 *Cell.* 1987;48:579-87.
- 887 29. Sternberg PW, Stern MJ, Clark I, Herskowitz I. Activation of the yeast *HO* gene  
888 by release from multiple negative controls. *Cell.* 1987;48:567-77.
- 889 30. Wang H, Clark I, Nicholson PR, Herskowitz I, Stillman DJ. The *Saccharomyces*  
890 *cerevisiae* *SIN3* gene, a negative regulator of *HO*, contains four paired  
891 amphipathic helix motifs. *Mol Cell Biol.* 1990;10(11):5927-36.
- 892 31. Dorland S, Deegenars ML, Stillman DJ. Roles for the *Saccharomyces*  
893 *cerevisiae* *SDS3*, *CBK1* and *HYM1* genes in transcriptional repression by *SIN3*.  
894 *Genetics.* 2000;154(2):573-86.
- 895 32. Bobola N, Jansen RP, Shin TH, Nasmyth K. Asymmetric accumulation of Ash1p  
896 in postanaphase nuclei depends on a myosin and restricts yeast mating-type  
897 switching to mother cells. *Cell.* 1996;84(5):699-709.

- 898 33. Sil A, Herskowitz I. Identification of asymmetrically localized determinant, Ash1p,  
899 required for lineage-specific transcription of the yeast HO gene. *Cell*.  
900 1996;84(5):711-22.
- 901 34. Maxon ME, Herskowitz I. Ash1p is a site-specific DNA-binding protein that  
902 actively represses transcription. *Proc Natl Acad Sci USA*. 2001;98(4):1495-500.
- 903 35. Strich R, Surosky RT, Steber C, Dubois E, Messenguy F, Esposito RE. *UME6* is  
904 a key regulator of nitrogen repression and meiotic development. *Genes Dev*.  
905 1994;8:796-810.
- 906 36. Whitehouse I, Rando OJ, Delrow J, Tsukiyama T. Chromatin remodelling at  
907 promoters suppresses antisense transcription. *Nature*. 2007;450(7172):1031-5.
- 908 37. Kadosh D, Struhl K. Repression by Ume6 involves recruitment of a complex  
909 containing Sin3 corepressor and Rpd3 histone deacetylase to target promoters.  
910 *Cell*. 1997;89(3):365-71.
- 911 38. Goldmark JP, Fazzio TG, Estep PW, Church GM, Tsukiyama T. The Isw2  
912 chromatin remodeling complex represses early meiotic genes upon recruitment  
913 by Ume6p. *Cell*. 2000;103(3):423-33.
- 914 39. Smith RL, Johnson AD. Turning genes off by Ssn6-Tup1: a conserved system of  
915 transcriptional repression in eukaryotes. *Trends Biochem Sci*. 2000;25(7):325-30.
- 916 40. Malave TM, Dent SY. Transcriptional repression by Tup1-Ssn6. *Biochem Cell*  
917 *Biol*. 2006;84(4):437-43.
- 918 41. Wong KH, Struhl K. The Cyc8-Tup1 complex inhibits transcription primarily by  
919 masking the activation domain of the recruiting protein. *Genes Dev*.  
920 2011;25(23):2525-39.
- 921 42. Hanlon SE, Rizzo JM, Tatomer DC, Lieb JD, Buck MJ. The stress response  
922 factors Yap6, Cin5, Phd1, and Skn7 direct targeting of the conserved co-  
923 repressor Tup1-Ssn6 in *S. cerevisiae*. *PloS one*. 2011;6(4):e19060.

- 924 43. Watson AD, Edmondson DG, Bone JR, Mukai Y, Yu Y, Du W, et al. Ssn6-Tup1  
925 interacts with class I histone deacetylases required for repression. *Genes Dev.*  
926 2000;14(21):2737-44.
- 927 44. Wu J, Suka N, Carlson M, Grunstein M. TUP1 utilizes histone H3/H2B-specific  
928 HDA1 deacetylase to repress gene activity in yeast. *Mol Cell.* 2001;7(1):117-26.
- 929 45. Robyr D, Suka Y, Xenarios I, Kurdistani SK, Wang A, Suka N, et al. Microarray  
930 deacetylation maps determine genome-wide functions for yeast histone  
931 deacetylases. *Cell.* 2002;109(4):437-46.
- 932 46. Davie JK, Edmondson DG, Coco CB, Dent SY. Tup1-Ssn6 interacts with multiple  
933 class I histone deacetylases in vivo. *J Biol Chem.* 2003;278(50):50158-62.
- 934 47. Green SR, Johnson AD. Promoter-dependent roles for the Srb10 cyclin-  
935 dependent kinase and the Hda1 deacetylase in Tup1-mediated repression in  
936 *Saccharomyces cerevisiae*. *Mol Biol Cell.* 2004;15(9):4191-202.
- 937 48. Cosma MP. Ordered recruitment: gene-specific mechanism of transcription  
938 activation. *Mol Cell.* 2002;10(2):227-36.
- 939 49. Carrozza MJ, Florens L, Swanson SK, Shia WJ, Anderson S, Yates J, et al.  
940 Stable incorporation of sequence specific repressors Ash1 and Ume6 into the  
941 Rpd3L complex. *Biochim Biophys Acta.* 2005;1731(2):77-87.
- 942 50. Zhang Q, Yoon Y, Yu Y, Parnell EJ, Garay JA, Mwangi MM, et al. Stochastic  
943 expression and epigenetic memory at the yeast *HO* promoter. *Proc Natl Acad Sci*  
944 *U S A.* 2013;110(34):14012-7.
- 945 51. Grzenda A, Lomberk G, Zhang JS, Urrutia R. Sin3: master scaffold and  
946 transcriptional corepressor. *Biochim Biophys Acta.* 2009;1789(6-8):443-50.
- 947 52. Di Talia S, Wang H, Skotheim JM, Rosebrock AP, Fletcher B, Cross FR.  
948 Daughter-specific transcription factors regulate cell size control in budding yeast.  
949 *PLoS biology.* 2009;7(10):e1000221.

- 950 53. Zapata J, Dephore N, Macdonough T, Yu Y, Parnell EJ, Mooring M, et al.  
951 PP2ARts1 is a master regulator of pathways that control cell size. *J Cell Biol.*  
952 2014;204(3):359-76.
- 953 54. Kurdistani SK, Grunstein M. Histone acetylation and deacetylation in yeast.  
954 *Nature reviews Molecular cell biology.* 2003;4(4):276-84.
- 955 55. Bailey TL, Elkan C. Fitting a mixture model by expectation maximization to  
956 discover motifs in biopolymers. *Proc Int Conf Intell Syst Mol Biol.* 1994;2:28-36.
- 957 56. Heinz S, Benner C, Spann N, Bertolino E, Lin YC, Laslo P, et al. Simple  
958 combinations of lineage-determining transcription factors prime cis-regulatory  
959 elements required for macrophage and B cell identities. *Mol Cell.*  
960 2010;38(4):576-89.
- 961 57. Peckham HE, Thurman RE, Fu Y, Stamatoyannopoulos JA, Noble WS, Struhl K,  
962 et al. Nucleosome positioning signals in genomic DNA. *Genome Res.*  
963 2007;17(8):1170-7.
- 964 58. Wynne J, Treisman R. SRF and MCM1 have related but distinct DNA binding  
965 specificities. *Nucleic Acids Res.* 1992;20(13):3297-303.
- 966 59. Rossi MJ, Lai WKM, Pugh BF. Genome-wide determinants of sequence-specific  
967 DNA binding of general regulatory factors. *Genome Res.* 2018;28(4):497-508.
- 968 60. Mai B, Miles S, Breeden LL. Characterization of the ECB binding complex  
969 responsible for the M/G(1)-specific transcription of CLN3 and SWI4. *Mol Cell*  
970 *Biol.* 2002;22(2):430-41.
- 971 61. Althoefer H, Schleiffer A, Wassmann K, Nordheim A, Ammerer G. Mcm1 is  
972 required to coordinate G2-specific transcription in *Saccharomyces cerevisiae*.  
973 *Mol Cell Biol.* 1995;15(11):5917-28.
- 974 62. Yu Y, Yarrington RM, Stillman DJ. FACT and Ash1 Promote Long-Range and  
975 Bidirectional Nucleosome Eviction at the *HO* Promoter. *Nucleic Acids*  
976 *Research*2020.

- 977 63. McBride HJ, Brazas RM, Yu Y, Nasmyth K, Stillman DJ. Long-range interactions  
978 at the *HO* promoter. *Mol Cell Biol*. 1997;17(5):2669-78.
- 979 64. Hartley PD, Madhani HD. Mechanisms that specify promoter nucleosome  
980 location and identity. *Cell*. 2009;137(3):445-58.
- 981 65. Yan C, Chen H, Bai L. Systematic Study of Nucleosome-Displacing Factors in  
982 Budding Yeast. *Mol Cell*. 2018;71(2):294-305 e4.
- 983 66. Morse RH. Transcription factor access to promoter elements. *J Cell Biochem*.  
984 2007;102(3):560-70.
- 985 67. Liu Q, Larsen B, Rიცოვა M, Orlicky S, Tekotte H, Tang X, et al. SCFCdc4  
986 enables mating type switching in yeast by cyclin-dependent kinase-mediated  
987 elimination of the Ash1 transcriptional repressor. *Mol Cell Biol*. 2011;31(3):584-  
988 98.
- 989 68. McBride HJ, Sil A, Measday V, Yu Y, Moffat J, Maxon ME, et al. The protein  
990 kinase Pho85 is required for asymmetric accumulation of the Ash1 protein in  
991 *Saccharomyces cerevisiae*. *Mol Microbiol*. 2001;42(2):345-53.
- 992 69. Arnosti DN, Kulkarni MM. Transcriptional enhancers: Intelligent enhanceosomes  
993 or flexible billboards? *J Cell Biochem*. 2005;94(5):890-8.
- 994 70. Thomas BJ, Rothstein R. Elevated recombination rates in transcriptionally active  
995 DNA. *Cell*. 1989;56:619-30.
- 996 71. Rothstein R. Targeting, disruption, replacement, and allele rescue: integrative  
997 DNA transformation in yeast. *Meth Enzymol*. 1991;194:281-302.
- 998 72. Sherman F. Getting started with yeast. *Meth Enzymol*. 1991;194:3-21.
- 999 73. Knop M, Siegers K, Pereira G, Zachariae W, Winsor B, Nasmyth K, et al. Epitope  
1000 tagging of yeast genes using a PCR-based strategy: more tags and improved  
1001 practical routines. *Yeast*. 1999;15(10B):963-72.
- 1002 74. Storici F, Lewis LK, Resnick MA. In vivo site-directed mutagenesis using  
1003 oligonucleotides. *Nat Biotechnol*. 2001;19(8):773-6.

- 1004 75. Vojtek AB, Hollenberg SM, Cooper JA. Mammalian Ras interacts directly with the  
1005 serine/threonine kinase Raf. *Cell*. 1993;74:205-14.
- 1006 76. Voth WP, Yu Y, Takahata S, Kretschmann KL, Lieb JD, Parker RL, et al.  
1007 Forkhead proteins control the outcome of transcription factor binding by  
1008 antiactivation. *EMBO J*. 2007;26(20):4324-34.
- 1009 77. Tellmann G. The E-Method: a highly accurate technique for gene-expression  
1010 analysis. *Nature Methods*. 2006;3:i-ii.
- 1011 78. Novocraft.com. Powerful tool designed for mapping of short reads onto a  
1012 reference genome from Illumina, Ion Torrent, and 454 NGS platforms. In:  
1013 <http://www.novocraft.com/products/novoalign/>, editor. 2020.
- 1014 79. Parnell TJ. Multiple-replica multiple-condition Macs2 ChIPSeq wrapper. In:  
1015 <https://github.com/HuntsmanCancerInstitute/MultiRepMacsChIPSeq>, editor.  
1016 2020.
- 1017 80. Quinlan AR, Hall IM. BEDTools: a flexible suite of utilities for comparing genomic  
1018 features. *Bioinformatics*. 2010;26(6):841-2.
- 1019 81. Kolde R. Implementation of heatmaps that offers more control over dimensions  
1020 and appearance. In: <https://cran.r-project.org/package=pheatmap>, editor. 2020.
- 1021 82. Parnell TJ. Tools for querying and analysis of genomic data. In:  
1022 <https://github.com/tjparnell/bitoolbox>, editor. 2020.
- 1023 83. Parnell TJ. Scripts for working with nucleosome sequences. In:  
1024 <https://github.com/tjparnell/bitoolbox-nucleosome>, editor. 2020.
- 1025 84. Heinz S. Hypergeometric Optimization of Motif EnRichment. In:  
1026 <http://homer.ucsd.edu/homer/>, editor. 2020.
- 1027  
1028



1029 **FIGURE LEGENDS**

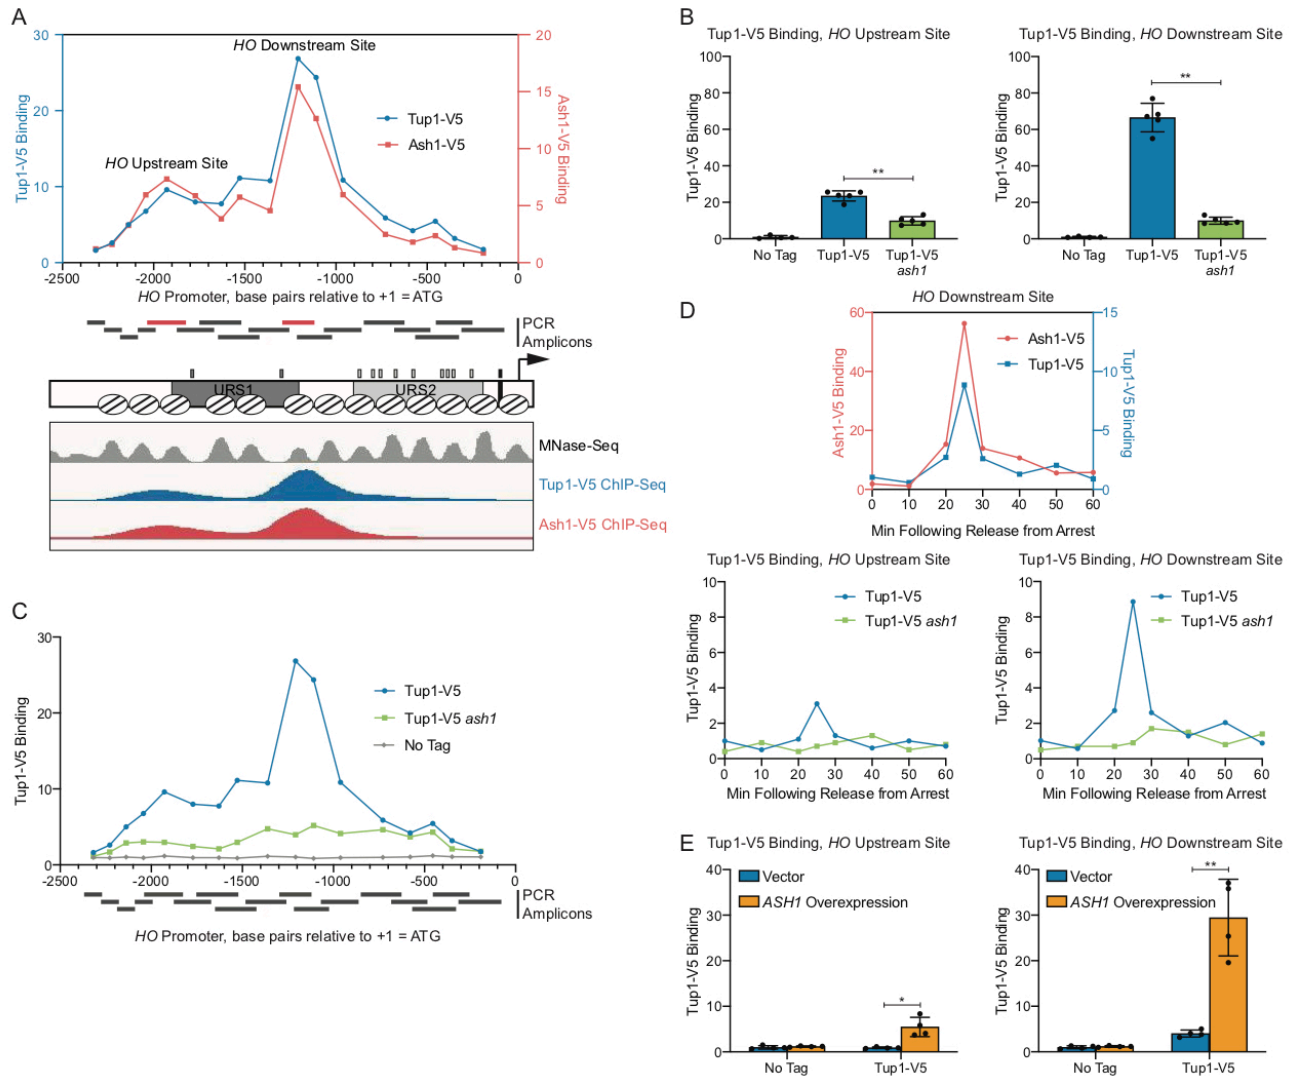

1030 **Figure 1. Tup1 associates with the *HO* promoter via Ash1.**

1031 (A) There are two peaks of binding at the *HO* promoter for both Tup1 and Ash1. Binding  
 1032 of Tup1-V5 (blue; left y-axis) and Ash1-V5 (red; right y-axis) to the *HO* promoter was  
 1033 determined by ChIP, followed by qPCR with primers that span from -2300 to -200 in 75  
 1034 to 150-bp intervals. Enrichment for each sample at *HO* was normalized to enrichment at  
 1035 an intergenic region on chromosome V (IGR-V) and to the corresponding input sample.  
 1036 Positions of the PCR amplicons are indicated with gray bars. Points on the graph

1037 correspond to the midpoints of these amplicons, with the x-axis indicating position  
1038 across the *HO* promoter. Amplicons shown in red display the highest levels of binding of  
1039 Tup1 and Ash1, labeled as “Upstream Site” (-2033 to -1823) and “Downstream Site” (-  
1040 1295 to -1121). A schematic of the *HO* promoter shows the positions of nucleosomes  
1041 from MNase-Seq [5] as ovals with slanted lines. The positions of Swi5 binding sites  
1042 (dark gray small rectangles; within URS1), SBF binding sites (light gray small  
1043 rectangles; within URS2), and the TATA element (black small rectangle) are also  
1044 indicated. ChIP-Seq for Tup1-V5 (blue) and Ash1-V5 (red) shown in the bottom panel  
1045 displays peaks of binding at the same Upstream and Downstream Site locations as the  
1046 traditional ChIP in the top graph.

1047 (B) Tup1 binding to the *HO* promoter is reduced in an *ash1* mutant at both the Upstream  
1048 and Downstream sites. Tup1-V5 ChIP analysis at the *HO* promoter, showing enrichment  
1049 at the Upstream Site (left; -2033 to -1823) and Downstream Site (right; -1295 to -1121).  
1050 For each sample, binding at each *HO* site was normalized to its corresponding input  
1051 DNA and to a No Tag control. Each dot represents a single data point, and error bars  
1052 reflect the standard deviation. \*\*  $p < 0.01$ , \*  $p < 0.05$ .

1053 (C) Tup1 binding to the *HO* promoter is not eliminated in an *ash1* mutant. Single  
1054 samples of Tup1-V5 ChIP from Tup1-V5 (blue), Tup1-V5 *ash1* (green) and No Tag  
1055 control (gray) strains were chosen from B and used for qPCR with primers that span the  
1056 *HO* promoter, as in A. Enrichment for each sample at *HO* was normalized to enrichment  
1057 at an intergenic region on chromosome V (IGR-V) and to the corresponding input  
1058 sample.

1059 (D) Tup1 and Ash1 bind to the *HO* promoter at the same time in the cell cycle. Binding  
1060 of Tup1-V5 and Ash1-V5 was measured by ChIP analysis with cells containing the  
1061 *GALp::CDC20* allele and synchronized by galactose withdrawal and readdition. The 0  
1062 min time point represents the G2/M arrest, before release with galactose addition. Cells  
1063 were harvested at the indicated time points following release (x-axis), and samples were

1064 processed for ChIP analysis. The top graph shows the coincidence of the timing for  
1065 binding of Ash1-V5 (red; left y-axis) and Tup1-V5 (blue; right y-axis). Bottom graphs  
1066 show binding of Tup1-V5 in wild type (blue) and *ash1* (green) backgrounds, at the *HO*  
1067 Upstream Site (left) and *HO* Downstream Site (right). Enrichment for each sample at  
1068 *HO* was normalized to enrichment at an intergenic region on chromosome I (IGR-I) and  
1069 to the corresponding input sample.

1070 (E) *ASH1* overexpression results in increased Tup1 recruitment. Tup1-V5 ChIP analysis  
1071 at the *HO* promoter, Upstream Site (left) and Downstream Site (right), is shown under  
1072 conditions in which *ASH1* is overexpressed. Strains were transformed with a pRS426  
1073 (YE<sub>p</sub>-*URA3*) vector, either empty (blue) or containing *ASH1* (green). Binding at the *HO*  
1074 sites for each sample was normalized to its corresponding input DNA and a No Tag  
1075 control. Each dot represents a single data point, and error bars reflect the standard  
1076 deviation. \*\*  $p < 0.01$ , \*  $p < 0.05$ .

1077

1078

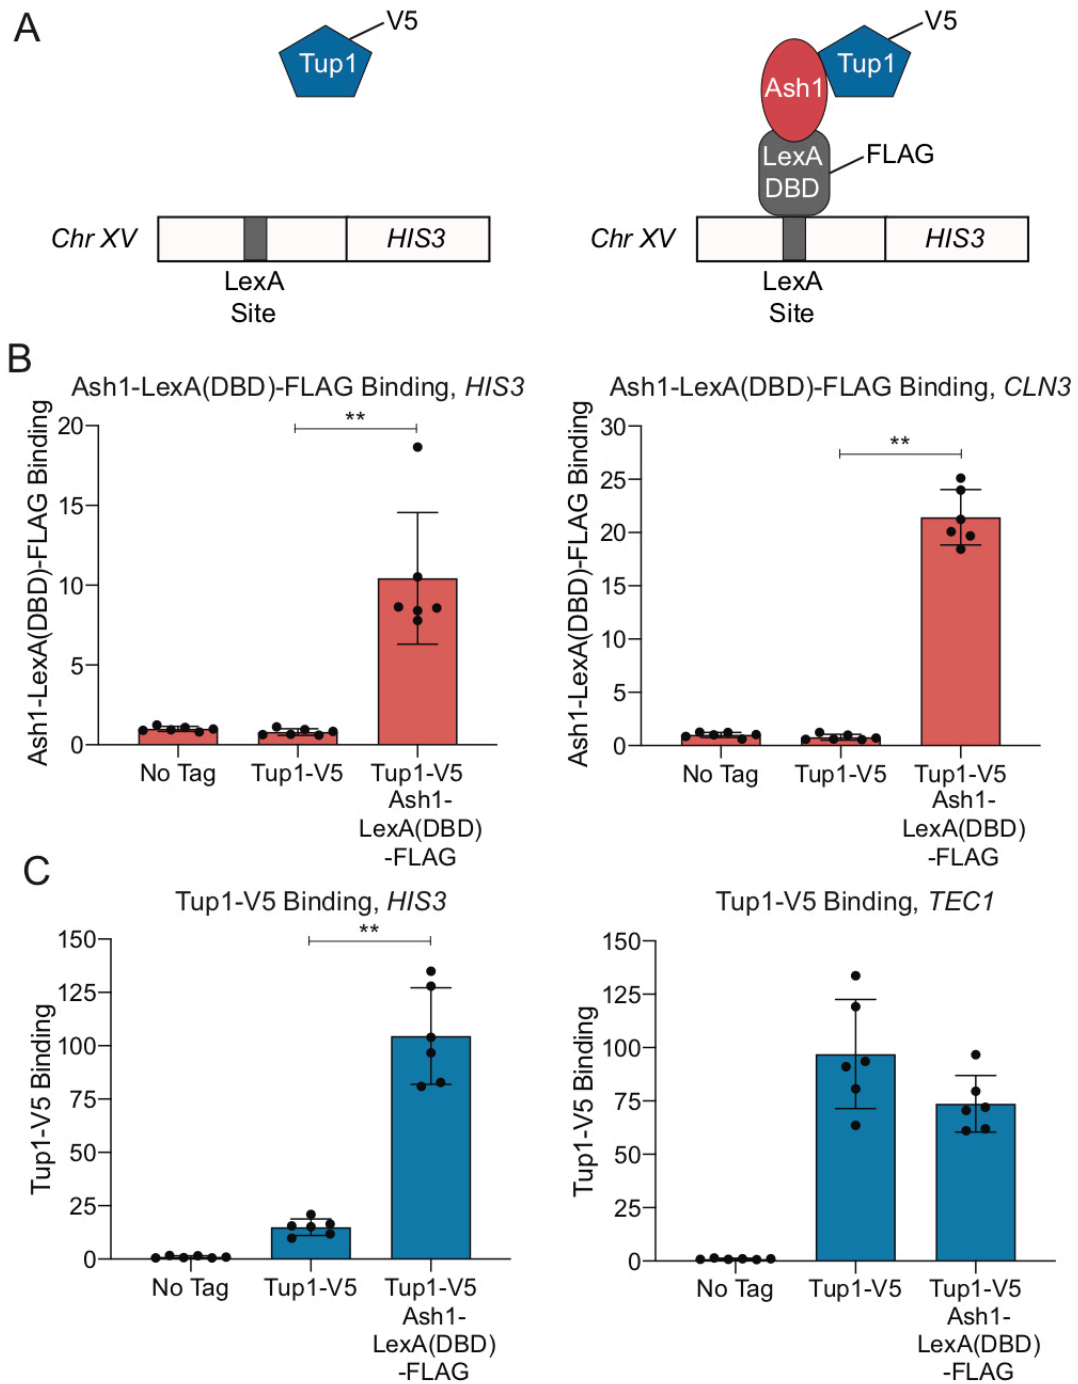

1079 **Figure 2. Ash1-LexA(DBD)-FLAG recruits Tup1-V5 to a LexA binding site on**  
1080 **chromosome XV.**

1081 (A) Schematic of experimental setup. Left – Strain with Tup1-V5 and LexA DNA-binding  
1082 site integrated upstream of the *HIS3* gene on chromosome XV. Right – Strain with  
1083 additional integration of Ash1-LexA(DBD)-FLAG. Recruitment of Tup1-V5 by Ash1-  
1084 LexA(DBD)-FLAG brings Tup1-V5 to the LexA binding site on chromosome XV.

1085 (B) Ash1-LexA(DBD)-FLAG associates with the *HIS3* LexA site. ChIP analysis shows  
1086 binding of Ash1-LexA(DBD)-FLAG to the LexA site upstream of *HIS3* (left) and to a  
1087 positive control site at *CLN3* (right). Enrichment for each sample was normalized to its  
1088 corresponding input DNA and a No Tag control. Each dot represents a single data point,  
1089 and error bars reflect the standard deviation. \*\*  $p < 0.01$ .

1090 (C) Tup1-V5 is recruited to the *HIS3* LexA site in a strain with Ash1-LexA(DBD)-FLAG.  
1091 ChIP analysis shows binding of Tup1-V5 to the LexA site upstream of *HIS3* (left) and to  
1092 a positive control site at *TEC1* (right). Enrichment for each sample was normalized to its  
1093 corresponding input DNA and a No Tag control. Each dot represents a single data point,  
1094 and error bars reflect the standard deviation. \*\*  $p < 0.01$ .

1095  
1096

1097

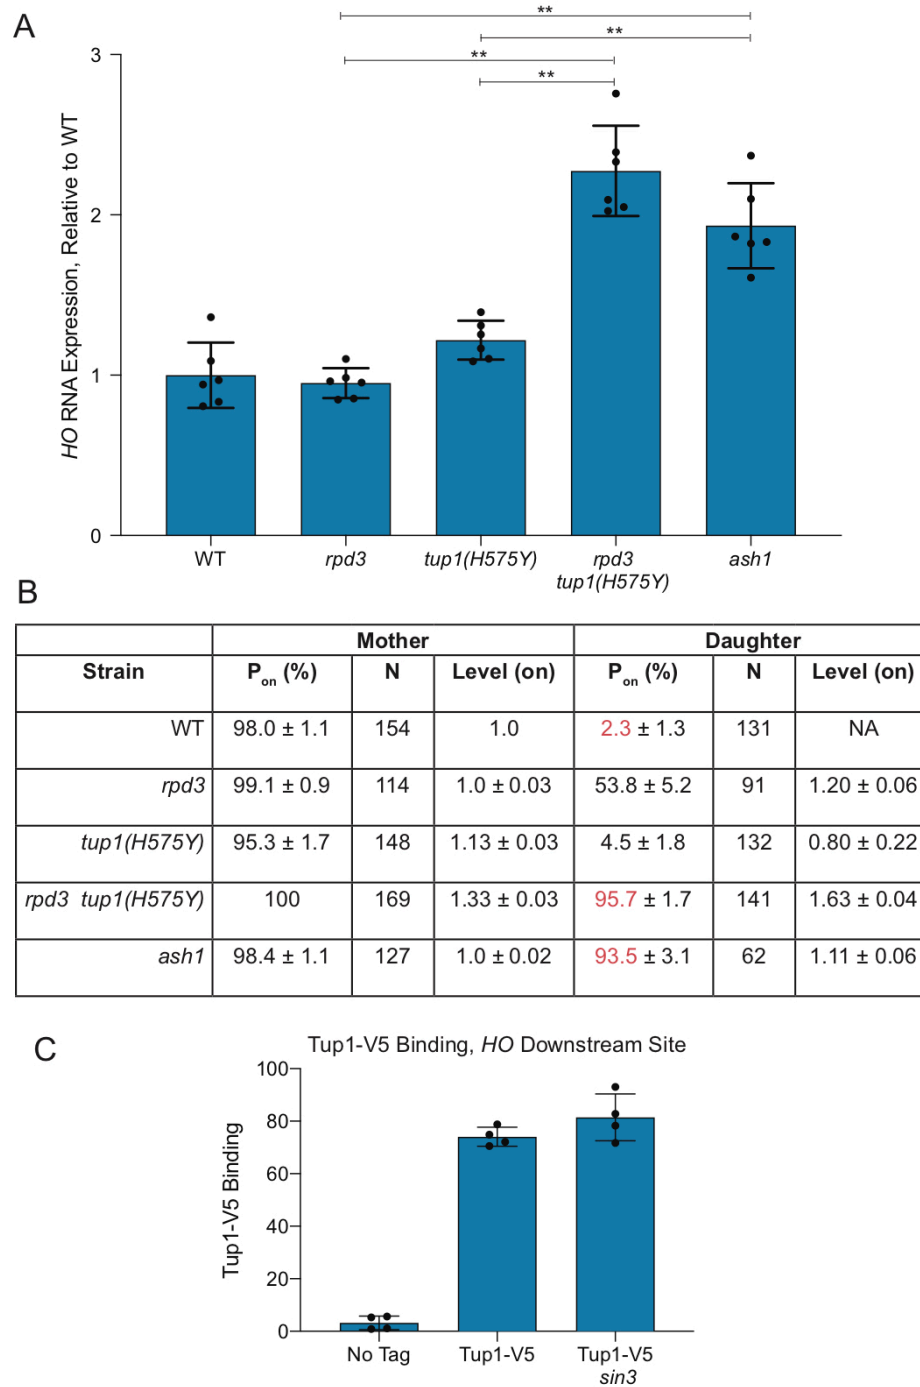

1098 **Figure 3. Repression of *HO* transcription via *Ash1* requires both *Tup1* and *Rpd3*.**

1099 (A) RNA analysis shows that *tup1* and *rpd3* mutations are additive. *HO* mRNA levels

1100 were measured by RT-qPCR, normalized to *RPR1*, and expressed relative to wild type.

1101 Each dot represents a single data point, and error bars reflect the standard deviation. \*\*

1102  $p < 0.01$ , \*  $p < 0.05$ .

1103 (B) Single cell analysis shows that *tup1* and *rpd3* mutations are additive. Single cell *HO-*  
1104 *GFP* fluorescence results for mother and daughter cells are shown, indicating the  
1105 percentage of cells in which *HO-GFP* was on ( $P_{on}$ ), the number of cells counted (N), and  
1106 the relative levels of expression (Level – on), which were normalized to the wild type  
1107 average, set at 1. Data for wild type, *rpd3* and *ash1* strains are from Zhang et al. [50].

1108 (C) Tup1 recruitment is not affected by a *sin3* mutation. Binding of Tup1-V5 to the *HO*  
1109 Downstream Site (-1295 to -1121) was determined by ChIP analysis, with each sample  
1110 normalized to its corresponding input DNA and a No Tag control. Each dot represents a  
1111 single data point, and error bars reflect the standard deviation.

1112

1113

1114

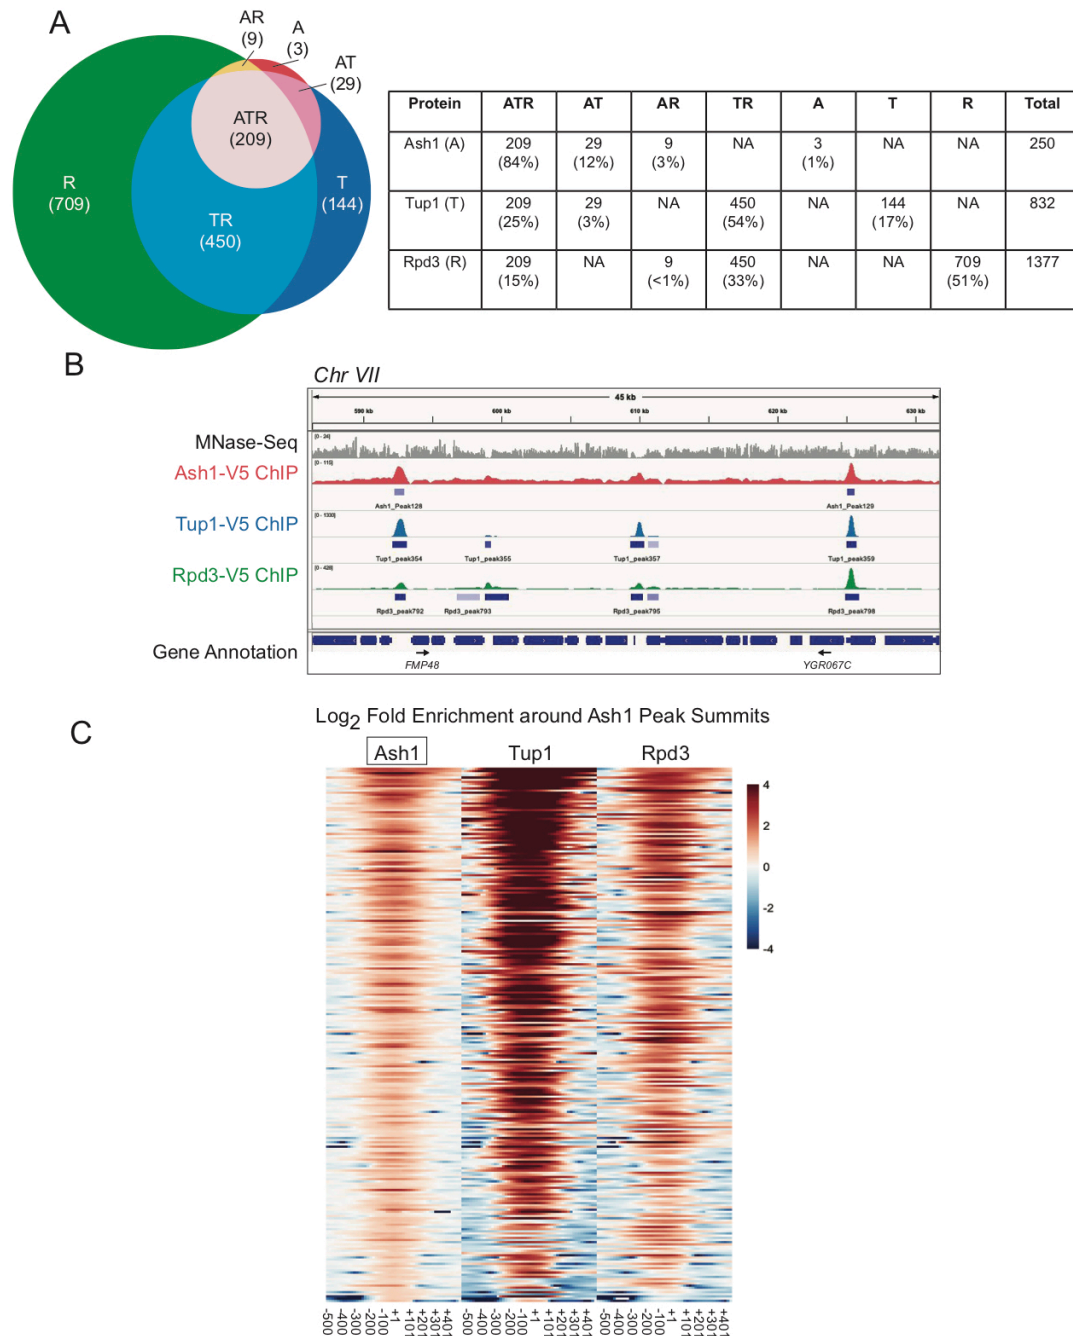

1115 **Figure 4. Most Ash1 genomic sites are co-occupied by Tup1 and Rpd3.**

1116 (A) Sites of overlap between Ash1-V5, Tup1-V5, and Rpd3-V5 ChIP-Seq peaks were  
 1117 determined. The table displays the number of peaks and percentage of peaks in each



1118 category of single factor peaks and overlapping factor peaks, where A = Ash1, T = Tup1  
1119 and R = Rpd3. Overlap is shown visually in the Venn diagram at the left.

1120 (B) Snapshot of ChIP-Seq results from the Genome Browser IGV (Broad Institute),  
1121 showing the sequenced fragment pileups for a portion of chromosome VII, with each  
1122 factor autoscaled independently because each factor had a different ChIP efficiency.  
1123 The top track (gray) shows MNase-Seq for nucleosome positioning reference [5]. The  
1124 colored tracks show ChIP-Seq results for Ash1-V5 (red), Tup1-V5 (blue) and Rpd3-V5  
1125 (green). The bottom track displays gene annotations. Gene names are indicated only for  
1126 those with start sites downstream of a site of Ash1-V5, Tup1-V5, and Rpd3-V5 (ATR)  
1127 co-enrichment. Additional snapshots are shown in Figure S4.

1128 (C) Heat maps depict the  $\log_2$ -fold enrichment of Ash1-V5, Tup1-V5 and Rpd3-V5 at  
1129 Ash1-V5 peak summits genome-wide (250 peaks), displaying enrichment from -500 to  
1130 +500 nucleotides relative to the center of each Ash1-V5 peak, in bins of 100-bp. The  
1131 color scale at the right indicates the level of  $\log_2$  fold enrichment for each factor. Each  
1132 horizontal line depicts a single Ash1-V5 peak of enrichment.

1133

1134

1135

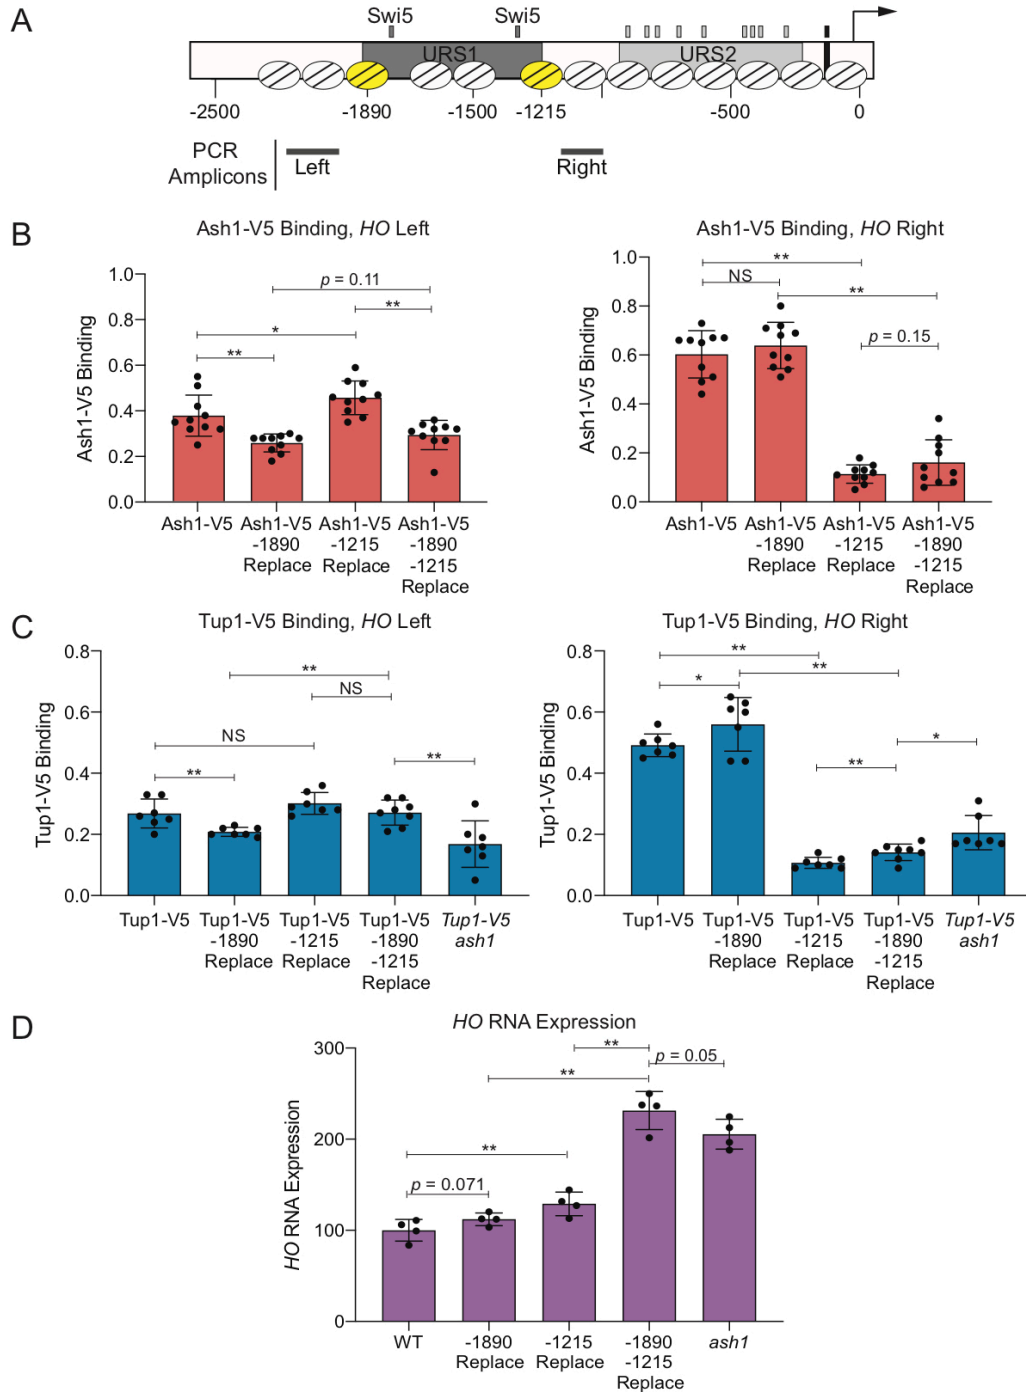

1136 **Figure 5. Ash1 and Tup1 association with the *HO* promoter occurs within two**  
 1137 **nucleosomes that flank the NDRs containing Swi5 binding sites.**

1138 (A) A schematic of the *HO* promoter shows upstream regulatory sequences URS1 and  
1139 URS2, Swi5 binding sites (dark gray small rectangles; within URS1), SBF binding sites  
1140 (light gray small rectangles; within URS2), and the TATA element (black small  
1141 rectangle). Positions of nucleosomes from MNase-Seq data [5] are shown as ovals with  
1142 slanted lines. The two nucleosomes substituted with *CDC39* sequence (-1890 and -  
1143 1215) are indicated in yellow. Positions of the Left and Right PCR amplicons are shown  
1144 as gray bars.

1145 (B) Nucleosome substitutions reduce Ash1 binding. Ash1-V5 ChIP analysis at the *HO*  
1146 promoter, showing enrichment upstream of the -1890 nucleosome (“-1890 Upper”; Left;  
1147 -2195 to -1998) and downstream of the -1215 nucleosome (“-1215 Lower”; Right; -1137  
1148 to -978). “Replace” indicates that the sequence of the nucleosome listed (either -1890 or  
1149 -1215) was substituted with the sequence of a nucleosome from the *CDC39* ORF.

1150 Binding at each *HO* site for each sample was normalized to *CLN3* as a positive  
1151 reference control and its corresponding input DNA. Each dot represents a single data  
1152 point, and error bars reflect the standard deviation. \*\*  $p < 0.01$ , \*  $p < 0.05$ .

1153 (C) Nucleosome substitutions reduce Tup1 recruitment. Tup1-V5 ChIP analysis at the  
1154 *HO* promoter, performed as in B, using *TEC1* as a positive reference control.

1155 (D) Substitutions at both nucleosomes increases *HO* expression to the level observed in  
1156 an *ash1* mutant. *HO* mRNA levels were measured, normalized to *RPR1*, and expressed  
1157 relative to wild type. Each dot represents a single data point, and error bars reflect the  
1158 standard deviation. \*\*  $p < 0.01$ , \*  $p < 0.05$ .

1159  
1160

1161

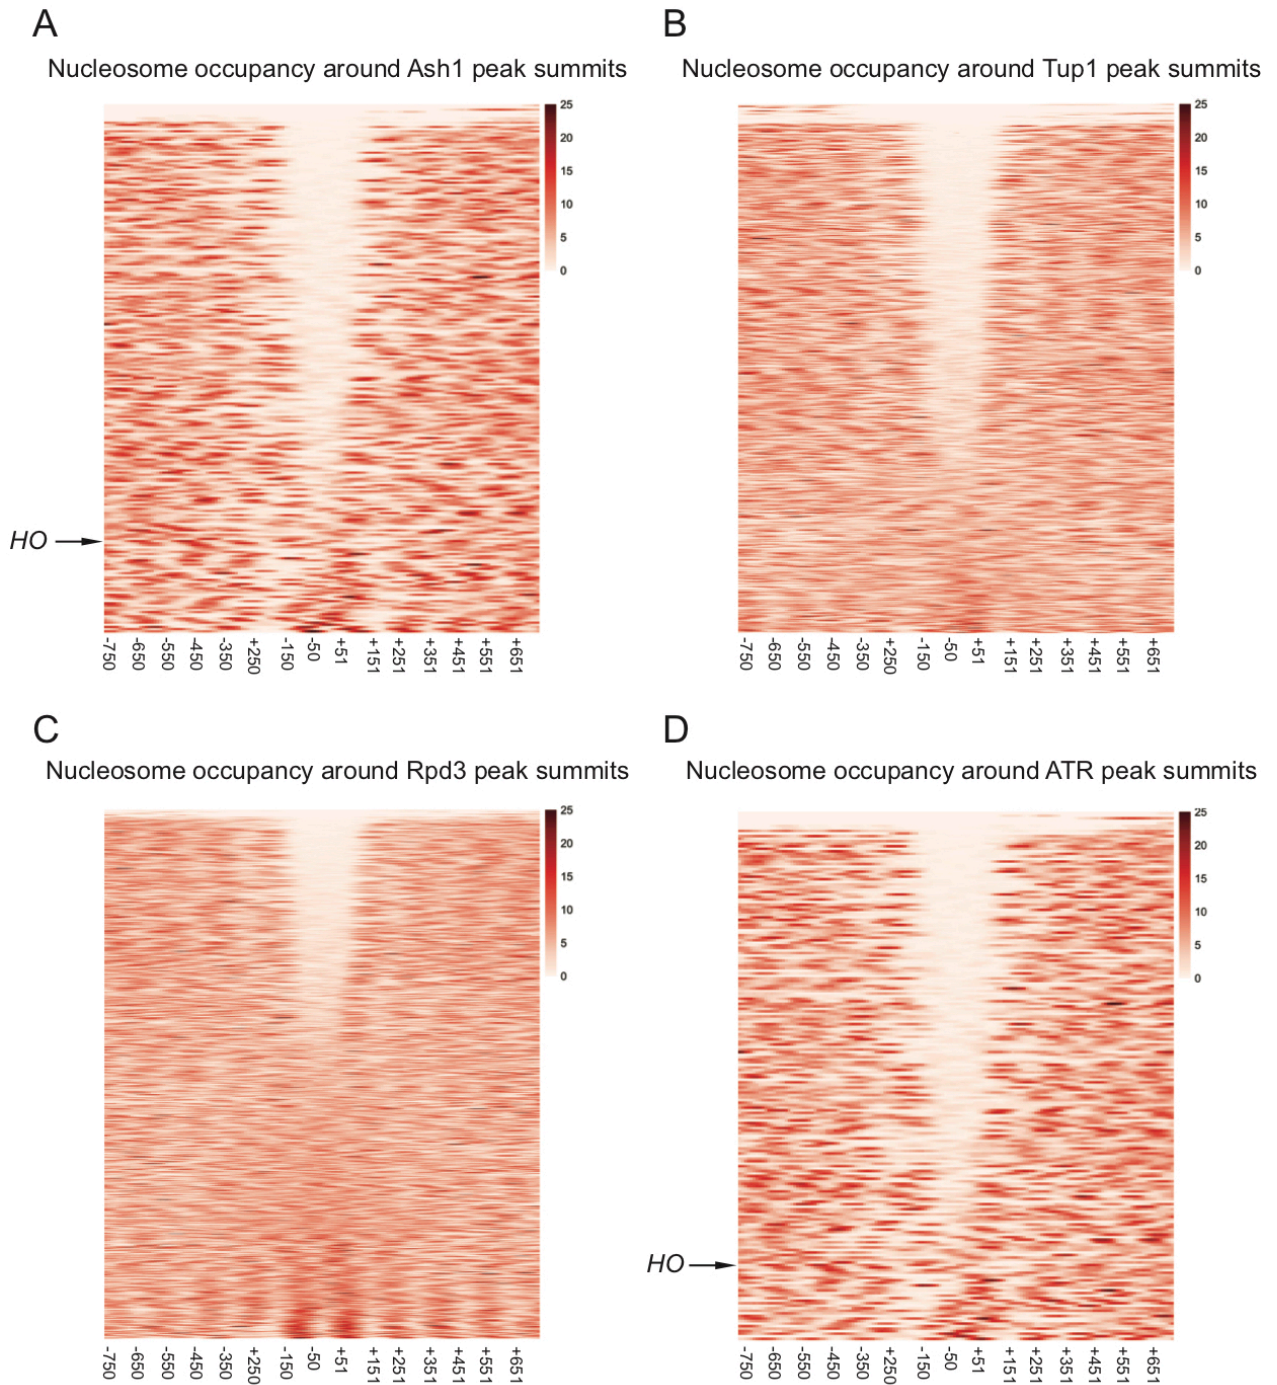

1162 **Figure 6. Sites of Ash1, Tup1, and Rpd3 co-enrichment are found within**  
1163 **nucleosome depleted regions (NDRs).**

1164 Heat maps depict the nucleosome occupancy surrounding peak summits, displaying  
1165 density from -750 to +750 nucleotides relative to the center of each peak, in bins of 100-  
1166 bp. The color scale at the right indicates the level of nucleosome occupancy (fragments  
1167 per million).

1168 (A) Each horizontal line depicts a single Ash1-V5 peak, of 250 total peaks, with the *HO*  
1169 peak indicated.

1170 (B) Each horizontal line depicts a single Tup1-V5 peak, of 832 total peaks.

1171 (C) Each horizontal line depicts a single Rpd3-V5 peak, of 1377 total peaks.

1172 (D) Each horizontal line depicts a single peak of co-enrichment of Ash1-V5, Tup1-V5  
1173 and Rpd3-V5, of 209 total peaks, with the *HO* peak indicated.

1174

1175

1176

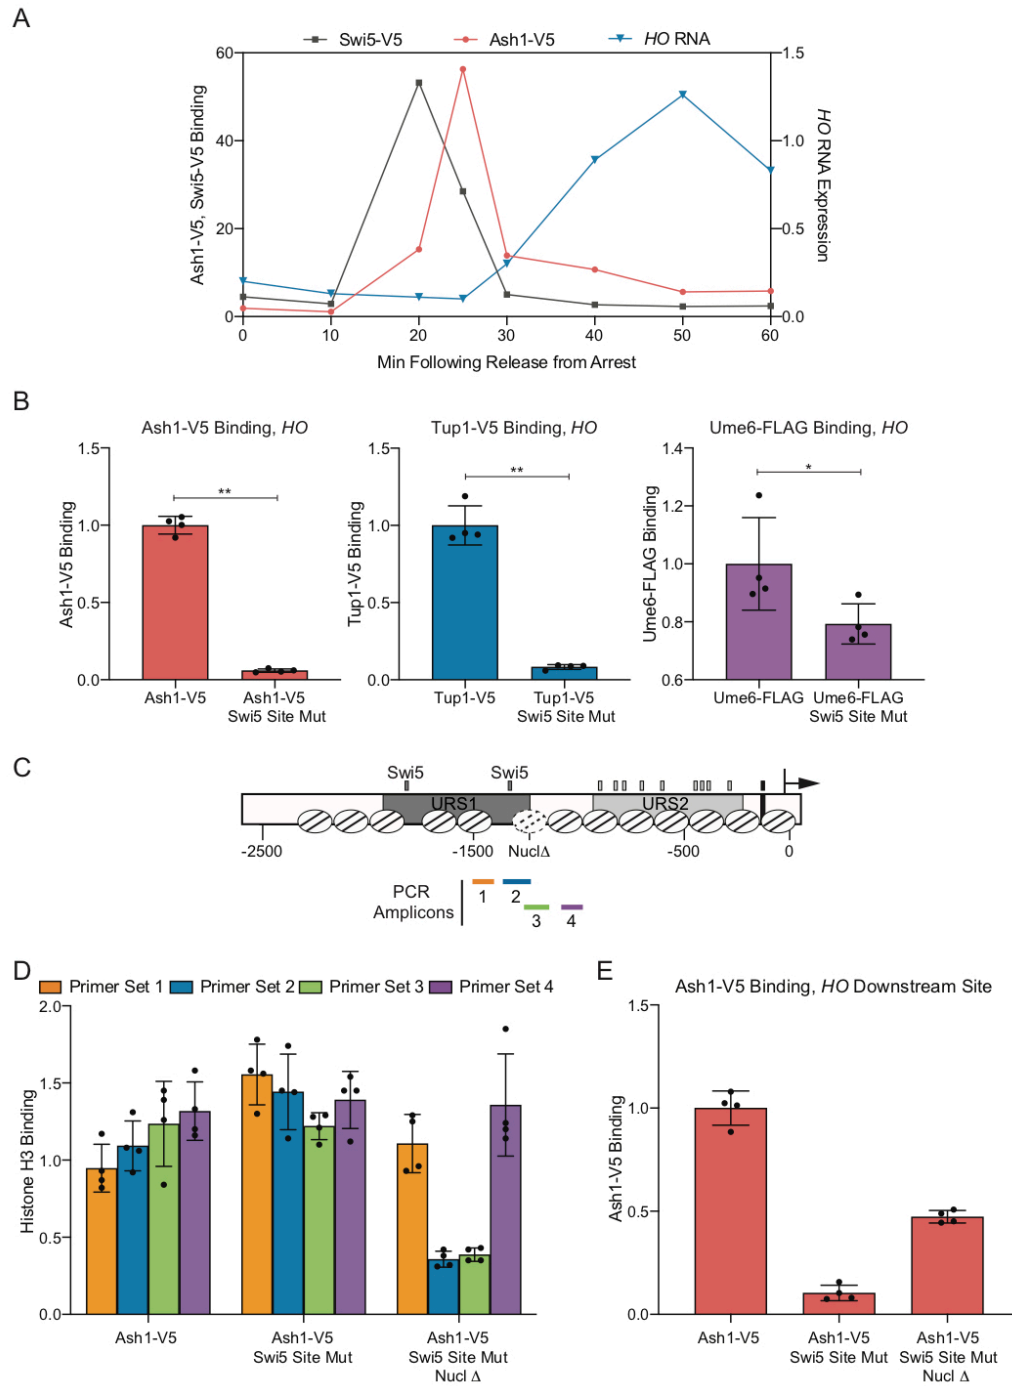

1177 **Figure 7. Binding of the Ash1 repressor to the *HO* promoter only occurs under**  
 1178 **conditions of low nucleosome density.**

1179 (A) Cell cycle time course of Swi5 binding, followed by Ash1 recruitment, and finally, *HO*  
1180 expression. ChIP and *HO* mRNA analysis were performed in Swi5-V5 or Ash1-V5  
1181 strains containing the *GALp::CDC20* allele and synchronized by galactose withdrawal  
1182 and readdition. The 0 min time point represents the G2/M arrest, before release with  
1183 galactose addition. Cells were harvested at the indicated time points following release  
1184 (x-axis). Binding of Swi5 (gray; *HO* -1429 to -1158; left y-axis) and Ash1 (red; *HO* -1295  
1185 to -1121; left y-axis) was normalized to enrichment at an intergenic region on  
1186 chromosome I (IGR-I) and to the corresponding input sample. *HO* mRNA levels (blue;  
1187 right y-axis) were normalized to *RPR1*.

1188 (B) Swi5 binding is required for Ash1 binding and Tup1 recruitment. Ash1-V5, Tup1-V5  
1189 and Ume6-FLAG ChIP analysis, followed by qPCR with primers from *HO* -1295 to -  
1190 1121. “Swi5 Site Mut” indicates strains in which both Swi5 binding sites are mutated and  
1191 nonfunctional for *HO* activation. Binding at *HO* for each sample was normalized to its  
1192 corresponding input DNA and to a positive reference control [CLN3 for Ash1, TEC1 for  
1193 Tup1 and INO1 for Ume6; 27]. Each dot represents a single data point, and error bars  
1194 reflect the standard deviation. \*\*  $p < 0.01$ , \*  $p < 0.05$ .

1195 (C) Schematic of the *HO* promoter with positions of nucleosomes from MNase-Seq  
1196 shown as ovals with slanted lines. The “Nucl  $\Delta$ ” nucleosome with dotted lines indicates  
1197 the -1215 nucleosome targeted for displacement by introduction of two Reb1 sites  
1198 (TTACCC) that substitute for *HO* sequences from -1268 to -1262 and from -1194 to -  
1199 1189. Positions of the PCR amplicons are indicated with colored bars.

1200 (D) H3 ChIP shows Reb1 sites lead to nucleosome loss. Graph shows histone H3 ChIP  
1201 analysis using strains that are Ash1-V5 with Swi5 wild type binding sites (Ash1-V5) or  
1202 Swi5 binding site mutations (Ash1-V5 Swi5 Site Mut) or Swi5 binding site mutations and  
1203 nucleosomal substitutions with Reb1 sites to displace the nucleosome (Ash1-V5 Swi5  
1204 Site Mut Nucl  $\Delta$ ). qPCR was performed with ChIP material using the following primers:  
1205 primer set 1 (orange) = *HO* -1497 to -1399; primer set 2 (green) = *HO* -1347 to -1248;

1206 primer set 3 (blue) = *HO* -1257 to -1158; primer set 4 (purple) = *HO* -1277 to -978.  
1207 Binding at each *HO* site was normalized to an intergenic region on chromosome I (IGR-  
1208 I) and to the corresponding input DNA and the No Tag control. \*\*  $p < 0.01$ , \*  $p < 0.05$ .  
1209 (E) Nucleosome loss partially restores Ash1 binding even in the absence of the normally  
1210 required Swi5 activator. Ash1 binding was measured by ChIP, using the same  
1211 chromatin samples as the histone H3 ChIP in D. Binding in each sample was measured  
1212 by qPCR at *HO* -1295 to -1121 and normalized to the *CLN3* positive reference control  
1213 and its corresponding input DNA. \*\*  $p < 0.01$ .  
1214  
1215



1216

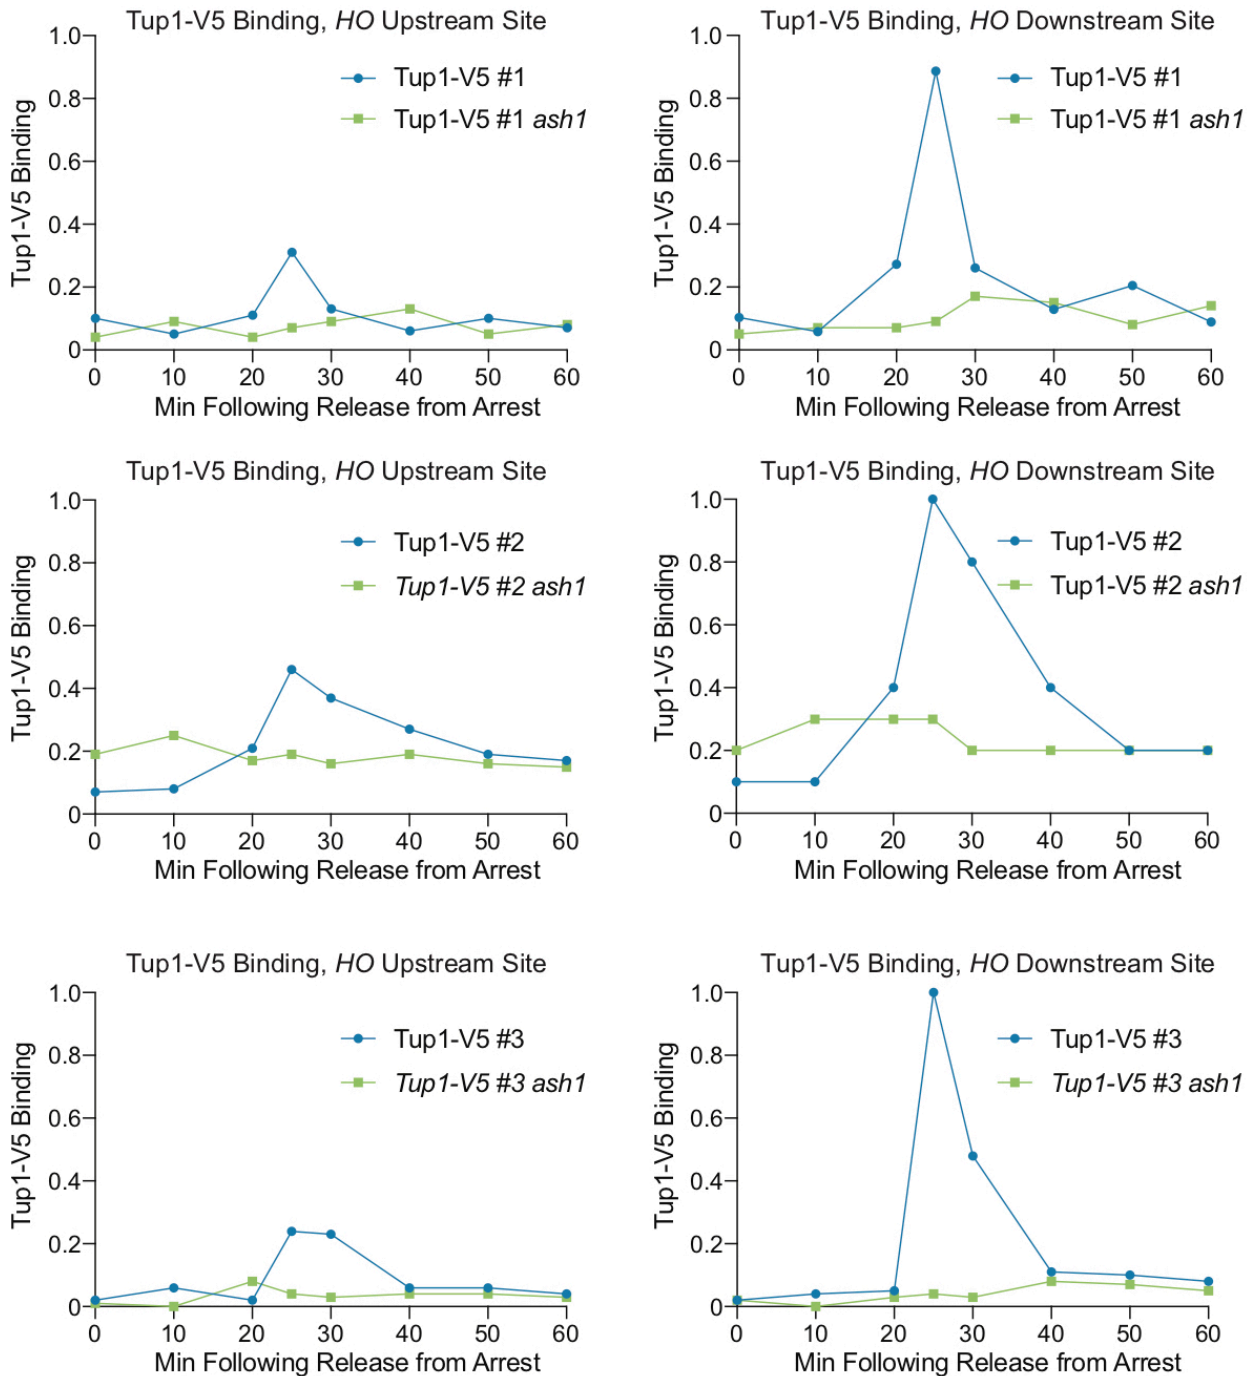

1217 **Figure S1. Ash1 facilitates Tup1 recruitment to the *HO* promoter.**

1218 Data from Figure 1D is shown along with two additional replicates of the experiment.

1219 Binding of Tup1-V5 was measured by ChIP analysis with cells containing the

1220 *GALp::CDC20* allele and synchronized by galactose withdrawal and readdition. The 0  
1221 min time point represents the G2/M arrest, before release with galactose addition. Cells  
1222 were harvested at the indicated time points following release (x-axis), and samples were  
1223 processed for ChIP analysis. Graphs show binding of Tup1-V5 in wild type (blue) and  
1224 *ash1* (green) cells, at the *HO* Upstream Site (left) and *HO* Downstream Site (right).  
1225 Enrichment for each sample at *HO* was normalized to enrichment at an intergenic  
1226 region on chromosome I (IGR-I) and to the corresponding input sample.  
1227  
1228

1229

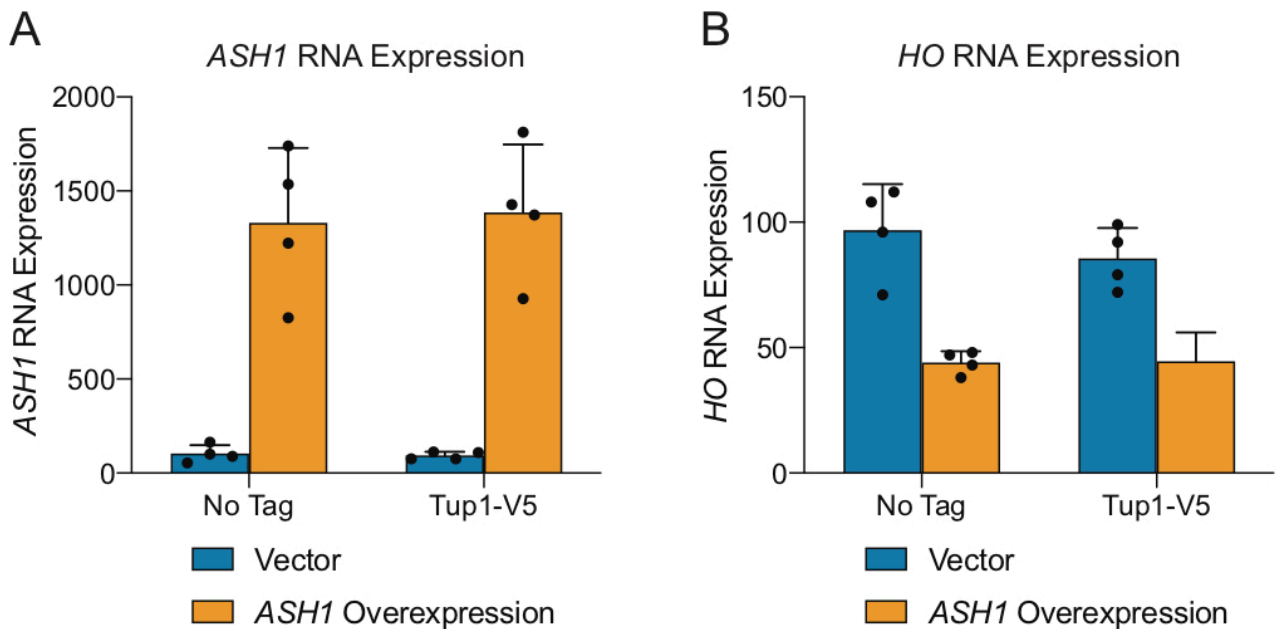

1230 **Figure S2. A multicopy *ASH1* plasmid increases *ASH1* mRNA and decreases *HO***  
1231 **mRNA levels.**

1232 (A) A YEp-*ASH1* multicopy plasmid results in increased *ASH1* mRNA  
1233 analysis under conditions of *ASH1* overexpression, using cell samples identical to those  
1234 in Figure 1E (Tup1-V5 ChIP analysis). Strains were transformed with a pRS426 YEp-  
1235 *URA3* vector, either empty (blue) or containing *ASH1* (green). *ASH1* mRNA levels were  
1236 measured, normalized to *RPR1*, and expressed relative to wild type. Each dot  
1237 represents a single data point, and error bars reflect the standard deviation.

1238 (B) A YEp-*ASH1* multicopy plasmid results in decreased *HO* mRNA levels. *HO* mRNA  
1239 analysis under conditions of *ASH1* overexpression, using cell samples identical to those  
1240 in Figure 1E (Tup1-V5 ChIP analysis). Strains were transformed with a pRS426 YEp-  
1241 *URA3* vector, either empty (blue) or containing *ASH1* (green). *HO* mRNA levels were  
1242 measured, normalized to *RPR1*, and expressed relative to wild type. Each dot  
1243 represents a single data point, and error bars reflect the standard deviation.

1244

1245

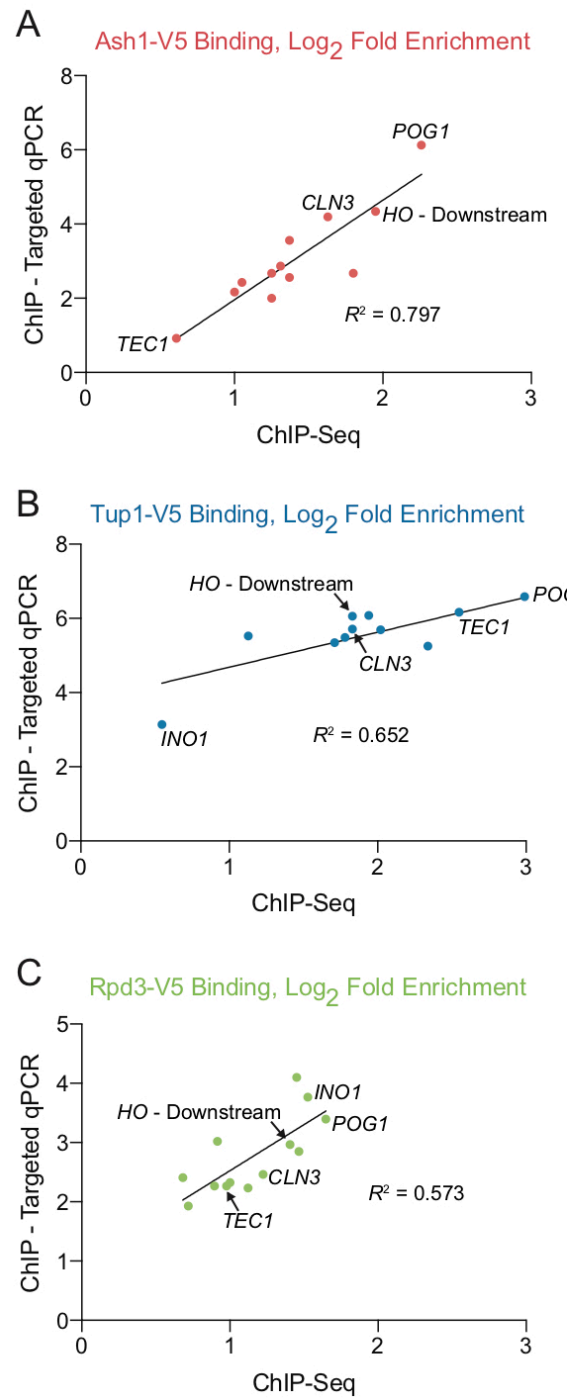

1246 **Figure S3. Correlation between targeted ChIP and ChIP-Seq.**

1247 Correlation plots showing Ash1-V5 (A), Tup1-V5 (B) and Rpd3-V5 (C) log<sub>2</sub> fold

1248 enrichment signals obtained via traditional ChIP (y-axis) and ChIP-Seq (x-axis). The

1249 genes tested are detailed in Table S4. Gene common names identify some of the dots  
1250 in the plots, including the *HO* Downstream site, *CLN3* (used as positive control for  
1251 Ash1-V5 ChIPs), *TEC1* (used as positive control for Tup1-V5 ChIPs; very low Ash1-V5  
1252 binding), *INO1* (used a positive control for Rpd3-V5 ChIPs; not bound by Ash1-V5), and  
1253 *POG1* (a high-scoring Ash1-V5 peak that shows co-localization with Tup1-V5 and  
1254 Rpd3-V5). The  $R^2$  value obtained from linear regression analysis of each plot is shown.

1255

1256

1257

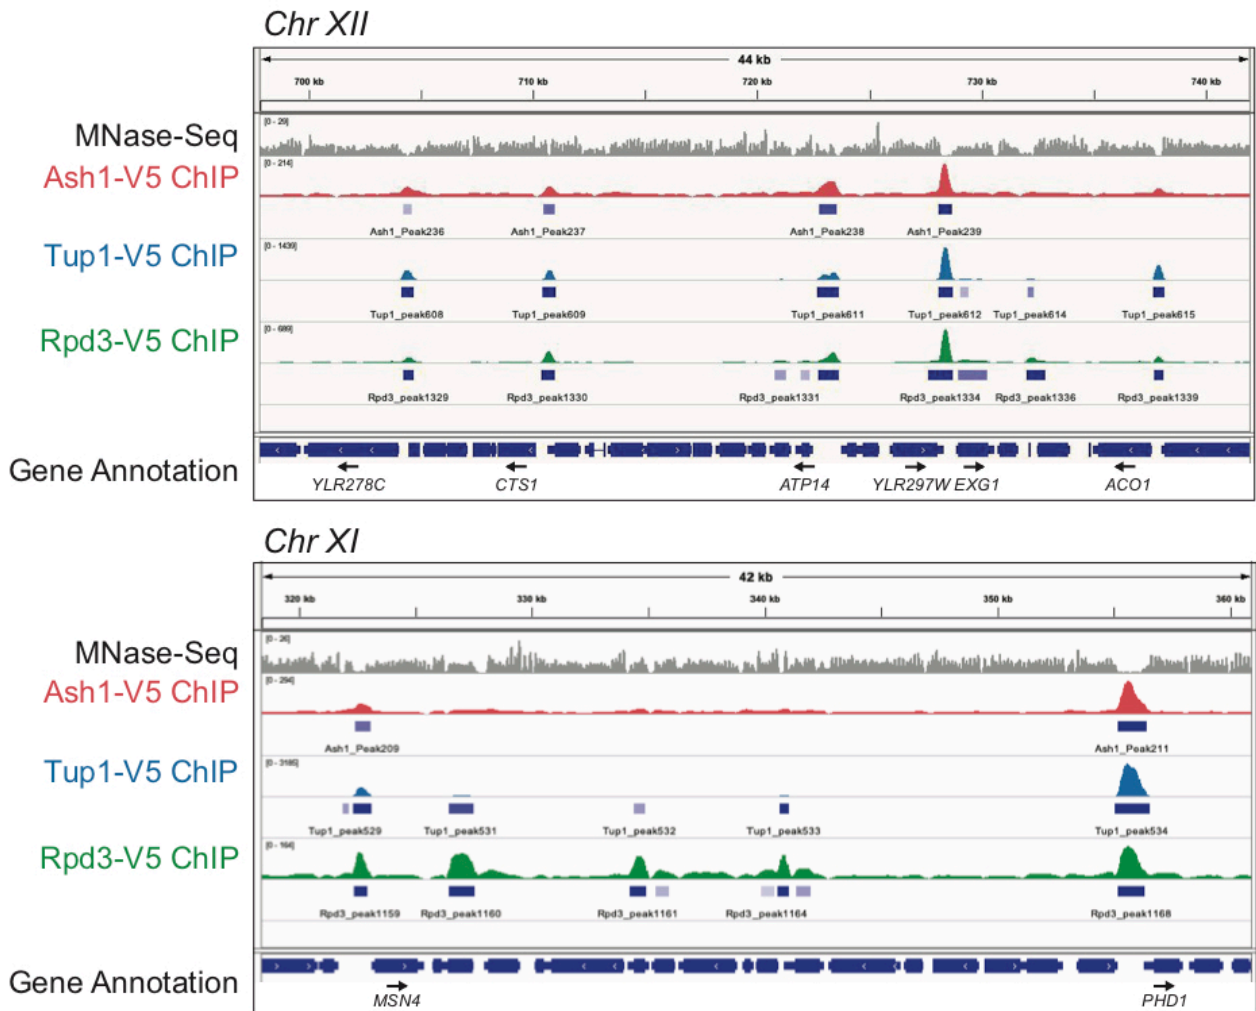

1258 **Figure S4. Browser snapshots to display overlap of Ash1, Tup1 and Rpd3.**  
1259 Additional snapshots of ChIP-Seq results from the Genome Browser IGV (Broad  
1260 Institute), showing sequenced fragment pileups for the portion of the indicated  
1261 chromosome, autoscaled for each factor independently (Refer to Fig 4B for another  
1262 snapshot). The top track (gray) for each set shows MNase-Seq for nucleosome  
1263 positioning reference. The colored tracks show ChIP-Seq results for Ash1-V5 (red),  
1264 Tup1-V5 (blue) and Rpd3-V5 (green). The bottom track displays gene annotation. Gene

1265 names are indicated only for those with start sites downstream of a site of Ash1-V5,

1266 Tup1-V5, and Rpd3-V5 co-enrichment.

1267

1268

1269

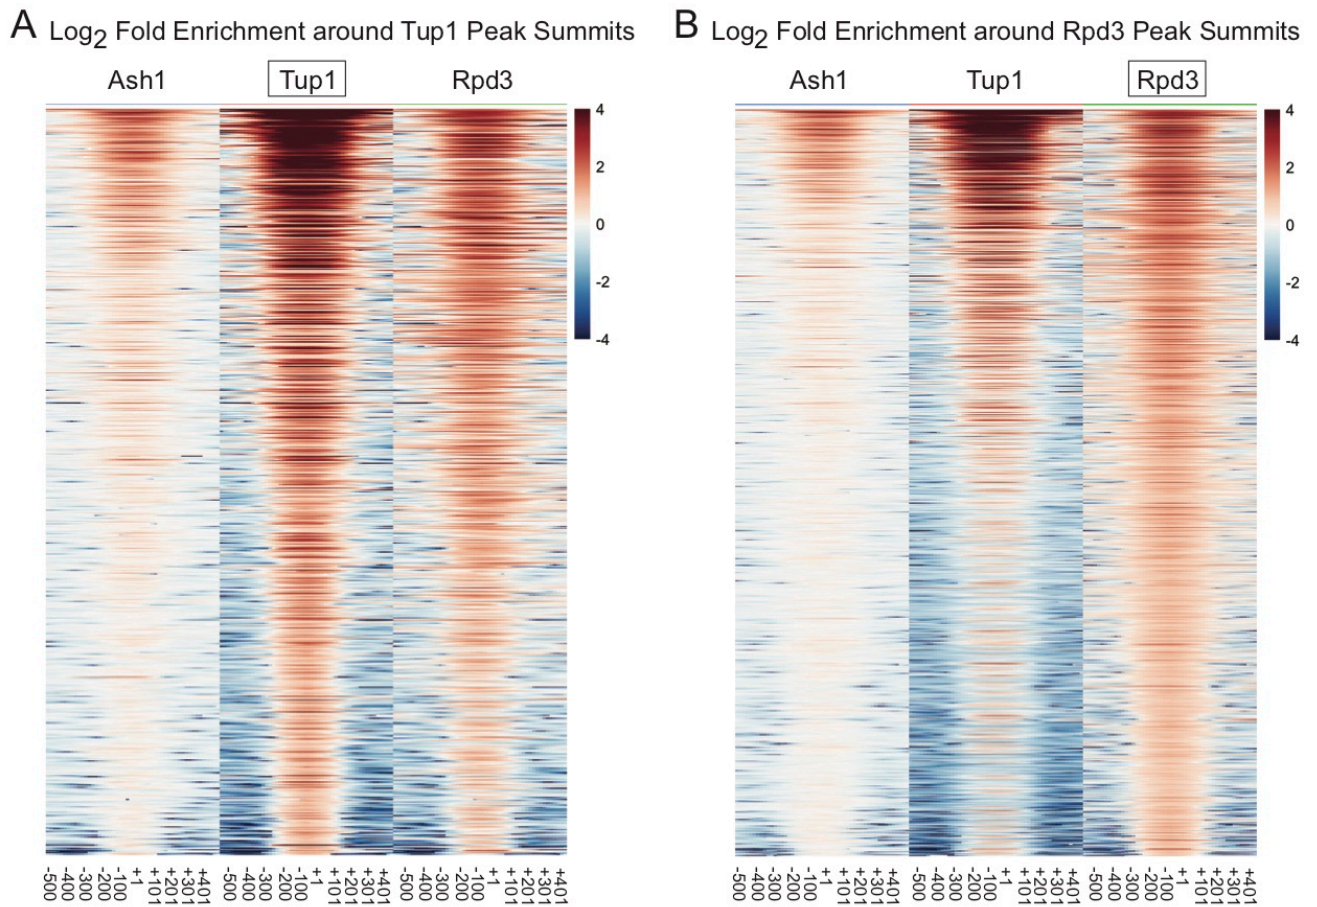

1270 **Figure S5. Tup1 and Rpd3 show substantial overlap at many genomic locations.**

1271 Heat maps depict the log<sub>2</sub> fold enrichment of Ash1-V5, Tup1-V5 and Rpd3-V5 from -500

1272 to +500 nucleotides relative to the center of each reference peak, in bins of 100-bp. The

1273 color scale at the right indicates the level of log<sub>2</sub> fold enrichment for each factor. Each

1274 horizontal line depicts a single peak of enrichment.

1275 (A) Tup1 peaks (858) used as the reference.

1276 (B) Rpd3 peaks (1377) used as the reference.

1277

1278



1279

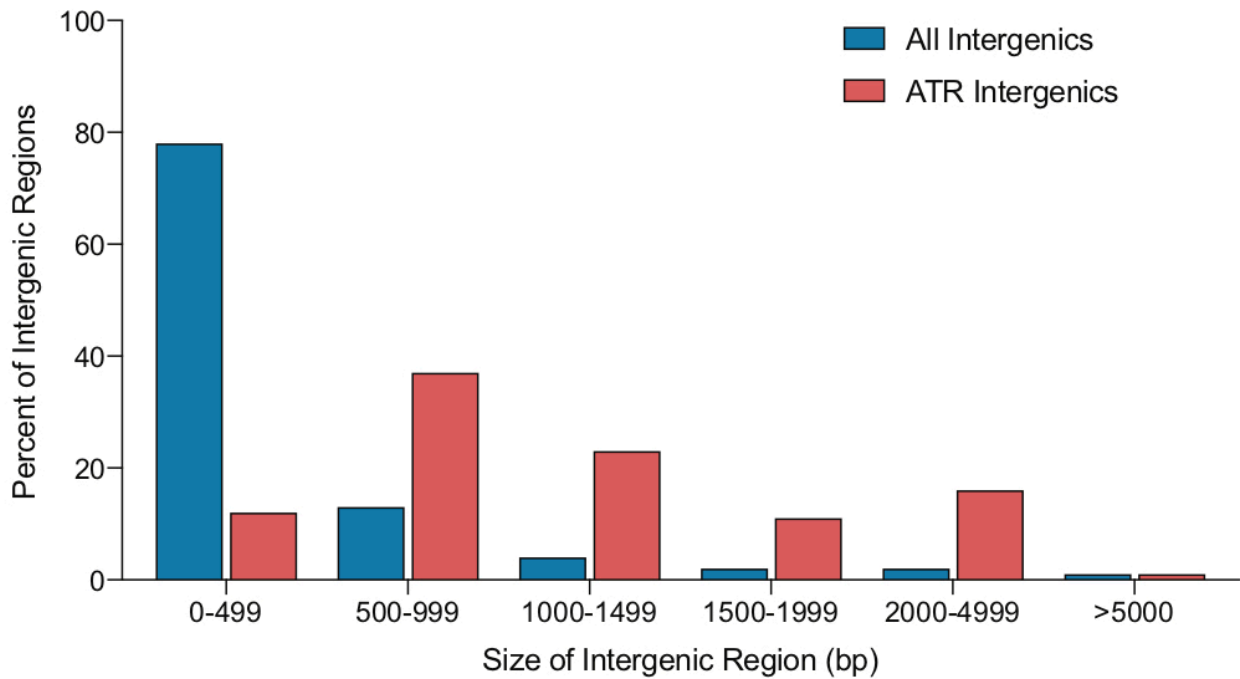

1280 **Figure S6. ATR peaks are preferentially located in very large intergenic regions.**

1281 Shown is the percent of intergenic regions (y-axis) within each of six size categories of  
1282 intergenic regions (x-axis). Distribution of genome-wide intergenic regions is shown in  
1283 blue, and distribution of intergenic regions containing ATR co-localized peaks is shown  
1284 in red.

1285

1286

1287

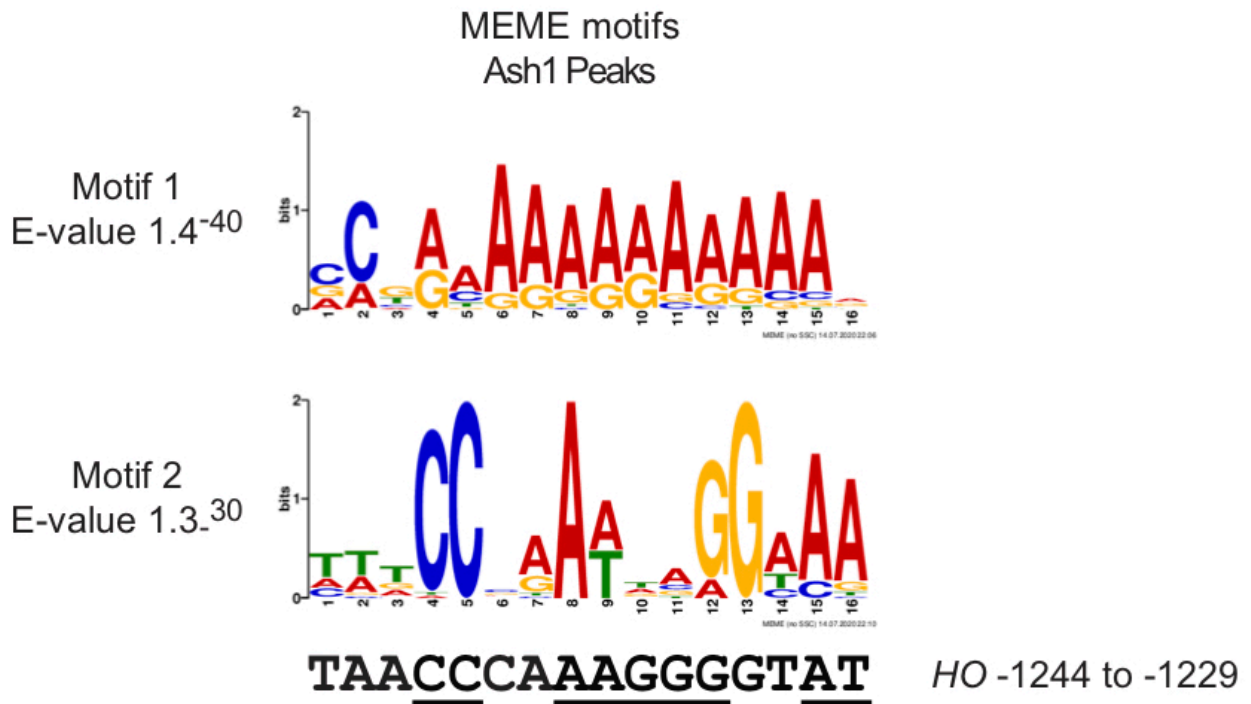

1288 **Figure S7. Motifs identified from MEME analysis of Ash1 peaks.**

1289 The top two motifs identified from MEME analysis of Ash1 peaks are shown. Motif 1 is  
1290 found in 68 of the 250 Ash1 peaks, and Motif 2 was identified in 49 Ash1 peaks. Motif 2  
1291 resembles an Mcm1 motif [58, 59]. The *HO* sequence from -1244 to -1229 is shown  
1292 below Motif 2, to which it bears some similarity. Combined mutation of all positions in  
1293 this region of the *HO* promoter (underlined) only modestly decreased Ash1 binding  
1294 (data not shown).

1295

1296

1297

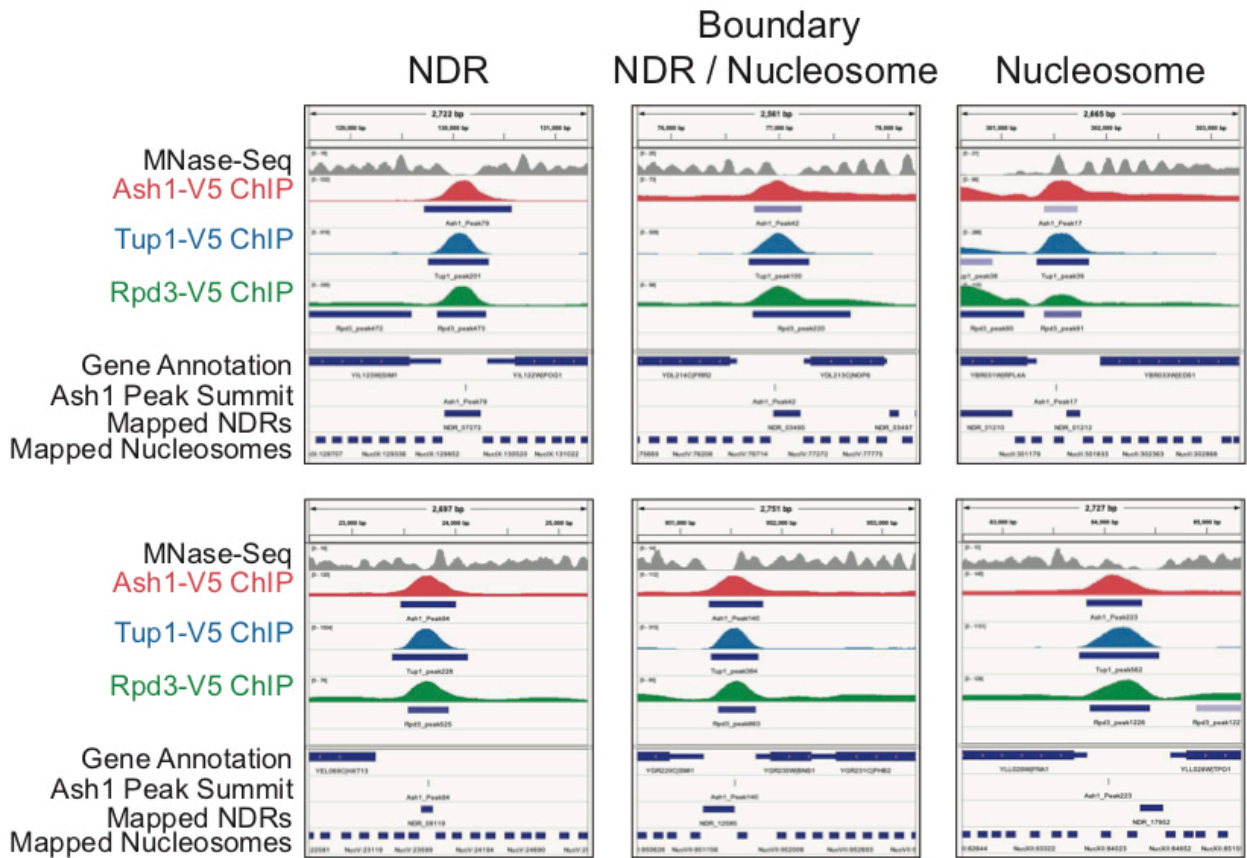

1298 **Figure S8. Browser snapshots of three types of ATR peaks.**

1299 IGV genome browser snapshots of sequenced fragment pileups are shown to  
1300 demonstrate two examples of ATR peaks from each category in Table 2 (NDR,  
1301 NDR/Nucleosome Boundary and Nucleosome). Each factor was autoscaled  
1302 independently. Tracks include: MNase-Seq nucleosome positions (gray), fragment  
1303 density of Ash1-V5 (red), Tup1-V5 (blue) and Rpd3-V5 (green), annotations of peaks  
1304 (beneath each fragment density track), gene annotation, position of the Ash1 peak  
1305 summit, and mapped NDRs and nucleosomes (using the MNase-Seq data).

1306

1307
